# Sensitivity analysis of Wnt $\beta$ -catenin based transcription complex might bolster power-logarithmic psychophysical law & reveal preserved gene gene interactions <sup>☆</sup>

shriprakash sinha<sup>1</sup>

*Faculty of IT and Mathematics  
Royal Thimphu College, Ngabiphu, P.O. Box - 1122, Bhutan*

---

## Abstract

Recently, psychophysical laws have been observed to be functional in certain factors working downstream of the Wnt pathway. This work tests the veracity of the prevalence of such laws, albeit at a coarse level, using sensitivity analysis on biologically inspired epigenetically influenced computational causal models. In this work, the variation in the effect of the predictive behaviour of the transcription complex (TRCMPLX) conditional on the evidences of gene expressions in normal/tumor samples is observed by varying the initially assigned values of conditional probability tables (cpt) for TRCMPLX. Preliminary analysis shows that the variation in predictive behaviour of TRCMPLX follows power-logarithmic psychophysical law, crudely. More recently, wet lab experiments have proved the existence of sensors that behave in a logarithmic fashion thus supporting the earlier proposed postulates based on computational sensitivity analysis of this manuscript regarding the existence of logarithmic behaviour in the signaling pathways. It also signifies the importance of systems biology approach where in silico experiments combined with in vivo/in vitro experiments have the power to explore the deeper mechanisms of a signaling pathway. Additionally, it is hypothesized that these laws are prevalent at gene-gene interaction level also. The interactions were obtained by thresholding the inferred conditional probabilities of a gene activation given the status of another gene activation. The deviation in the interactions in normal/tumor samples was similarly observed by varying the initially assigned values of conditional probability tables (cpt) for TRCMPLX. Analysis of deviation in interactions show prevalence of psychophysical laws and

---

<sup>☆</sup>Code with dataset is made available under GNU GPL v3 license at google code project on <https://sites.google.com/site/shriprakashsinha/shriprakashsinha/projects/static-bn-for-wnt-signaling-pathway>. Please use the scripts in R as well as the files in zipped directory titled Results-2015.

*Email address:* [ssinha@rtc.bt](mailto:ssinha@rtc.bt) (shriprakash sinha)

<sup>1</sup>This work was conducted by Sinha as an independent researcher during the period from 2013 to 2016. ORCID : [orcid.org/0000-0001-7027-5788](https://orcid.org/0000-0001-7027-5788)

is reported for interaction between elements of pairs (SFRP3, MYC), (SFRP2, CD44) and (DKK1, DACT2). Based on crude static models, it is assumed that dynamic models of Bayesian networks might reveal the phenomena in a better way.

*Keywords:* Psychophysical laws; Wnt pathway; Causal models; Inference; Bayesian Network; Sensitivity analysis; Gene interaction network

---

## 1. Introduction & problem statement

Ever since the accidental discovery of the Wingless in 1973 by Sharma (1973), a tremendous amount of research work has been carried out in the related field of Wnt signaling pathway in the past forty years. A majority of the work has focused on issues related to • the discovery of genetic and epigenetic factors affecting the pathway Thorstensen et al. (2005) & Baron and Kneissel (2013), • implications of mutations in the pathway and its dominant role on cancer and other diseases Clevers (2006), • investigation into the pathway's contribution towards embryo development Sokol (2011), homeostasis Pinto et al. (2003), Zhong et al. (2014) and apoptosis Pečina-Šlaus (2010) and • safety and feasibility of drug design for the Wnt pathway Kahn (2014), Garber (2009), Voronkov and Krauss (2012), Blagodatski et al. (2014) & Curtin and Lorenzi (2010). More recent informative reviews have touched on various issues related to the different types of the Wnt signaling pathway and have stressed not only the activation of the Wnt signaling pathway via the Wnt proteins Rao and Kühl (2010) but also the on the secretion mechanism that plays a major role in the initiation of the Wnt activity as a prelude Yu and Virshup (2014).

In a more recent development, there has been the observation and study of psychophysical laws prevailing within the pathway and in this regard Goentoro and Kirschner (2009) point to two findings namely, • the robust fold changes of  $\beta$ -catenin and • the transcriptional machinery of the Wnt pathway depends on the fold changes in  $\beta$ -catenin instead of absolute levels of the same and some gene transcription networks must respond to fold changes in signals according to the Weber (1834) law in sensory physiology. Note that Weber's law has been found to be a special case of Bernoulli's logarithmic law Masin et al. (2009). If a sensation magnitude  $\gamma$  be determined by a stimulus magnitude  $\beta$ , then the Weber's law states that  $\Delta\gamma$  remains constant when the relative stimulus increment  $\Delta\beta$  remains constant. The law derives from a more general Bernoulli's law were  $\Delta\gamma \propto \log \frac{\Delta\beta}{\beta}$ . In an unrelated work by Sun et al. (2012), it has been shown that these laws arise at computational level as Bayes optimal under neurobiological constraints at implementational and algorithmic levels. The proposed mathematical framework for understanding the psychophysical scales as Bayes optimal and information theoretically-optimal representation of time sampled continuous valued stimuli is based on established neurobiological assumptions. Sun et al. (2012) also show that the psychophysical laws connect well to quantization frameworks and state that only discrete set of output is distinguishable

37 due to biological constraints. This discretization leads to quantization of stim-  
38 ulus also as the nonlinear scaling of the stimulus that leads to the resultant  
39 output is invertible. These mathematical insights might explain the indistin-  
40 guishable insensitive fold changes in levels of  $\beta$ -catenin shown by Goentoro and  
41 Kirschner (2009).

42 Based on the importance of the revealed phenomena, it might be useful to  
43 know if these observations could be verified using computational models apart  
44 from analysis of results from wet lab experiments. What is needed is a frame-  
45 work that can capture the causal semantics of the signaling pathway where the  
46 influence diagrams involving the interacting extra/intracellular factors working  
47 in the pathway, represent the biological knowledge/mechanism of the pathway  
48 to a certain extent. Once a model representation is available, the desired varia-  
49 tion in the activity of an input factor and the observed variation in the output  
50 of the activity of factor(s) can be studied. Sensitivity analysis plays a crucial  
51 role in observing the behaviour of output of a variable given variations in the  
52 input. As will be seen later, probabilistic graphical models or Bayesian networks  
53 provide a framework for representing the causal semantics of the pathway under  
54 investigation.

55 To address these issues, the current work uses the Bayesian network model  
56 proposed in Sinha (2014) and conducts sensitivity analysis on the model to  
57 check the observations regarding the prevalence of the reported psychophysical  
58 laws. In Sinha (2014), it was shown via hypothesis testing that the active  
59 (repressed) state of *TRCMPLX* in the Wnt signaling pathway for colorectal  
60 cancer cases is not always correspond to the tumorous (normal) state of the  
61 test sample under consideration. For this, Sinha (2014) shows various results  
62 on the predicted state of *TRCMPLX* conditional on the given gene evidences,  
63 while varying the assigned probability values of conditional probability tables of  
64 *TRCMPLX* during initialization of the biologically inspired Bayesian Network  
65 model. Here, the degree of belief in the activity of *TRCMPLX* is denoted by  
66 the prior probability assigned to the node of *TRCMPLX* in the network. It  
67 was found that the predicted values often increase with an increasing value (in  
68 conditional probability tables) of the activity of *TRCMPLX* on certain genes.  
69 What this asks for is that for the recorded deviations due to the changes made  
70 in these prior probabilities (i.e the input deviations), is it possible to observe the  
71 prevalent logarithmic laws and their deviations (like the Weber's law) as shown  
72 by Goentoro and Kirschner (2009), using computational causal modeling?

73 In this manuscript, the preliminary analysis of deviations computed from  
74 variation in prior and estimated conditional probability values using Bayesian  
75 network model in Sinha (2014) show that the variation in predictive behaviour  
76 of *TRCMPLX* conditional on gene evidences (i.e the output deviation) follows  
77 power and logarithmic psychophysical law crudely, apropos the variation in  
78 assigned priors of *TRCMPLX* (i.e input deviations). This implies that the  
79 deviations in output are proportional to increasing function of deviations in  
80 input. This relates to the work of Adler et al. (2014) on power and logarithmic  
81 law albeit at a coarse level. The granularity is obscured due to the use of  
82 static data from Jiang et al. (2008) that is used in Sinha (2014) as well as

83 the Bayesian network model that encodes the belief in the factors affecting  
84 the pathway in terms of probabilities as well as the inferences made based on  
85 the updating of these probabilities conditional on discretized states of gene  
86 expression values as evidences. Irrespective of the hurdle posed by the causal  
87 models, inferences made based on prior biological knowledge and gene expression  
88 evidences coupled with sensitivity analysis sheds light on the prevalent power-  
89 logarithmic psychophysical laws in the pathway. *Note that the foundations of*  
90 *the current work were presented as poster in the International Conference on*  
91 *Systems Biology of Human Disease at the German Cancer Research Center*  
92 *in Heidelberg (Germany) in 2015. Followup of some of the implications were*  
93 *shared with a few labs for verification and it is gladdening to see that in a recent*  
94 *development via wet lab experiments by Olsman and Goentoro (2016), it has been*  
95 *confirmed that there are existence of sensors that behave in a logarithmic fashion.*  
96 *The wet lab work by Olsman and Goentoro (2016) supports the earlier proposed*  
97 *crude postulates based on computational sensitivity analysis of this manuscript*  
98 *regarding the existence of logarithmic behaviour in the signaling pathways. It also*  
99 *signifies the importance of systems biology approach where in silico experiments*  
100 *combined with in vivo/in vitro experiments have the power to explore the deeper*  
101 *mechanisms of a signaling pathway.*

102 Adler et al. (2014) show in detail that these laws can be studied empiri-  
103 cally using models that exhibit the property of fold change detection (FCD).  
104 What this means is that the output depends on the relative changes in the  
105 input. The biological feedback models employed for these studies consider var-  
106 ious parameters like rates of production of a compound, removal removal of  
107 a compound, repression of a compound, levels of scaffolds, kinases, etc. that  
108 might be responsible for exhibiting these laws. The current work using the  
109 static Bayesian network model might not propose feedback loops directly as  
110 used by Adler et al. (2014), yet it could reveal existence of the loops via causal  
111 inference even while using static data. The drawback of the current work is  
112 its inability to consider cyclic loops. This can be rectified by use of dynamic  
113 Bayesian network models that incorporate interaction represented in time se-  
114 ries data. Also, the use of Bayesian network models can help in studying the  
115 problem from a multiparameter setting as various factors affecting the pathway  
116 can be connected in the influence diagrams of the network through the principle  
117 of *d*-connectivity/separability. This connectivity will be explained later in the  
118 required theory section.

119 Note that Goentoro and Kirschner (2009) show results for the behaviour  
120 of fold change of  $\beta$ -catenin with respect to changes in the single parameter  
121 values i.e the Wnt. On similar lines, the current work takes into account the  
122 behaviour of *TRCMPLX* conditional on affects of multiple parameters in the  
123 form of evidences of various intra/extracellular gene expression values working  
124 in the pathway, based on the changes made in the assigned prior probabilities  
125 for *TRCMPLX*. The difference here is that one can analyse changes in nodes  
126 of a computational model to explore an inherent law in comparison to use of  
127 wet lab experiments. The issue here is that FCD which is recorded with re-  
128 spect to changes in levels of concentration can now be recorded via changes in

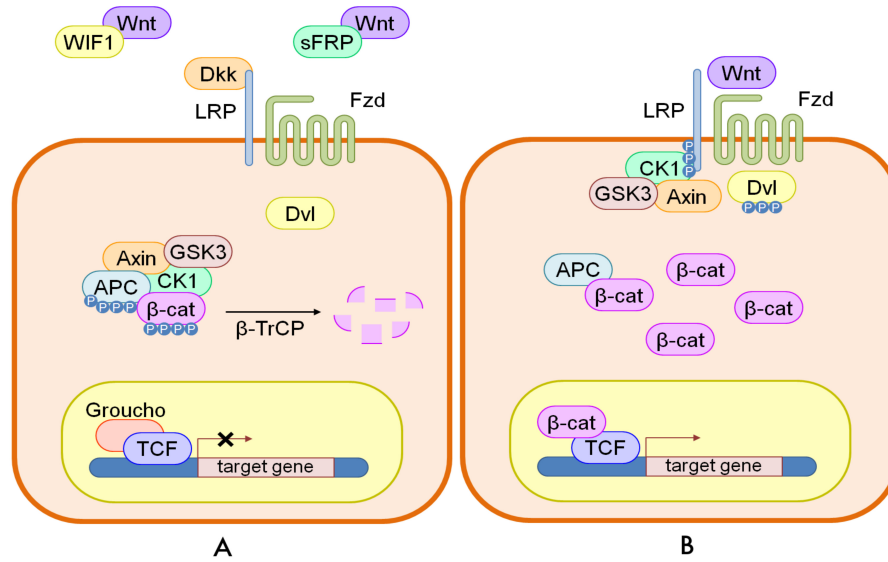

Figure 1: A cartoon of Wnt signaling pathway adapted from Sinha (2014). Part (A) represents the destruction of  $\beta$ -catenin leading to the inactivation of the Wnt target gene. Part (B) represents activation of Wnt target gene.

129 the strength of belief in the occurrence of an event. For example, suppose it  
 130 is not known by what degree the *TRCMPLX* plays a major role in the signaling  
 131 pathway quantitatively, then it is possible to encode the degree of belief  
 132 regarding the role of *TRCMPLX* in the form of prior or conditional probabilities  
 133 during initialization of the network. By recording the deviations in these  
 134 probabilities and observing the output deviations, it is possible to study certain  
 135 psychophysical laws. Finally, this does not mean that probabilities related  
 136 to actual concentrations cannot be encoded. Thus, Bayesian networks help in  
 137 capturing the desired biological knowledge via various causal arcs and conditional  
 138 probabilities and sensitivity analysis aids in the study of the such natural  
 139 behaviour.

140 As a second observation, the forgoing result points towards stability in the  
 141 behaviour of *TRCMPLX* and this stability is reflected in the preserved gene  
 142 gene interactions across the changing values of the priors of *TRCMPLX*. The  
 143 interactions are inferred from conditional probabilities of individual gene activation  
 144 given the status of another gene activation. Finally, as a third observation,  
 145 it would be interesting to note if the psychophysical laws are prevalent among  
 146 the dual gene-gene interactions or not. If the results are affirmative then the  
 147 following important speculations might hold true • Not just one factor but  
 148 components of the entire network might be exhibiting such a behavior at some  
 149 stage or the other. • The psychophysical law might not be restricted to individual  
 150 intra/extracellular components but also to the interactions among the the

151 intra/extracellular components in the pathway. This might mean that the inter-  
152 actions manifest during the prevalence of power and logarithmic laws. Further  
153 wet lab analysis is needed to verify these computational claims.

154 It is important to be aware of the fact that the presented results are derived  
155 from a static Bayesian network model. It is speculated that dynamic models  
156 might give much better and more realistic results.

## 157 2. Revisiting the requisite theory

158 To understand the logical flow of the current paper, some details of the above  
159 related topics from Sinha (2014) are revisited here in order and subdivided into  
160 descriptions of - (1) general working of canonical Wnt signaling pathway and  
161 some of the involved epigenetic factors (2) introduction to Bayesian networks  
162 and (3) the intuition behind the Bayesian network model employed. This is  
163 followed by Weber's law and its derivation and finally the notations and termi-  
164 nologies to understand the results and discussion section.

### 165 2.1. Canonical Wnt signaling pathway

166 The canonical Wnt signaling pathway is a transduction mechanism that con-  
167 tributes to embryo development and controls homeostatic self renewal in several  
168 tissues Clevers (2006). Somatic mutations in the pathway are known to be as-  
169 sociated with cancer in different parts of the human body. Prominent among  
170 them is the colorectal cancer case Gregorieff and Clevers (2005). In a succinct  
171 overview, the Wnt signaling pathway works when the Wnt ligand gets attached  
172 to the Frizzled(*fzd*)/*LRP* coreceptor complex. *Fzd* may interact with the Dis-  
173 shevelled (*Dvl*) causing phosphorylation. It is also thought that Wnts cause  
174 phosphorylation of the *LRP* via casein kinase 1 (*CK1*) and kinase *GSK3*.  
175 These developments further lead to attraction of Axin which causes inhibition  
176 of the formation of the degradation complex. The degradation complex consti-  
177 tutes of *Axin*, the  $\beta$ -*catenin* transportation complex *APC*, *CK1* and *GSK3*.  
178 When the pathway is active the dissolution of the degradation complex leads to  
179 stabilization in the concentration of  $\beta$ -*catenin* in the cytoplasm. As  $\beta$ -*catenin*  
180 enters into the nucleus it displaces the *Groucho* and binds with transcription  
181 cell factor *TCF* thus instigating transcription of Wnt target genes. *Groucho*  
182 acts as lock on *TCF* and prevents the transcription of target genes which may  
183 induce cancer. In cases when the Wnt ligands are not captured by the corecep-  
184 tor at the cell membrane, *Axin* helps in formation of the degradation complex.  
185 The degradation complex phosphorylates  $\beta$ -*catenin* which is then recognized  
186 by *Fbox/WD* repeat protein  $\beta$ -*TrCP*.  $\beta$ -*TrCP* is a component of ubiq-  
187 uitin ligase complex that helps in ubiquitination of  $\beta$ -*catenin* thus marking it  
188 for degradation via the proteasome. Cartoons depicting the phenomena of Wnt  
189 being inactive and active are shown in figures 1(A) and 1(B), respectively.

## 190 2.2. Epigenetic factors

191 One of the widely studied epigenetic factors is methylation Costello and Plass  
192 (2001), Das and Singal (2004), Issa (2007). Its occurrence leads to decrease in  
193 the gene expression which affects the working of Wnt signaling pathways. Such  
194 characteristic trends of gene silencing like that of secreted frizzled-related pro-  
195 teins (*SFRP*) family in nearly all human colorectal tumor samples have been  
196 found at extracellular level Suzuki et al. (2004). Similarly, methylation of genes  
197 in the Dickkopf (*DKKx* Niehrs (2006), Sato et al. (2007), Dapper antagonist  
198 of catenin (*DACTx* Jiang et al. (2008) and Wnt inhibitory factor-1 (*WIF1*  
199 Taniguchi et al. (2005) family are known to have significant effect on the Wnt  
200 pathway. Also, histone modifications (a class of proteins that help in the for-  
201 mation of chromatin which packs the DNA in a special form Strahl and Allis  
202 (2000) can affect gene expression Peterson et al. (2004). In the context of the  
203 Wnt signaling pathway it has been found that *DACT* gene family show a pec-  
204 uliar behavior in colorectal cancer Jiang et al. (2008). *DACT1* and *DACT2*  
205 showed repression in tumor samples due to increased methylation while *DACT3*  
206 did not show obvious changes to the interventions. It is indicated that *DACT3*  
207 promoter is simultaneously modified by the both repressive and activating (bi-  
208 valent) histone modifications Jiang et al. (2008).

## 209 2.3. Bayesian Networks

210 In reverse engineering methods for control networks Gardner and Faith  
211 (2005) there exist many methods that help in the construction of the networks  
212 from the data sets as well as give the ability to infer causal relations between  
213 components of the system. A widely known architecture among these methods  
214 is the Bayesian Network (BN). These networks can be used for causal reasoning  
215 or diagnostic reasoning or both. It has been shown through reasoning and ex-  
216 amples in Roehrig (1996) that the probabilistic inference mechanism applied via  
217 Bayesian networks are analogous to the structural equation modeling in path  
218 analysis problems.

219 Initial works on BNs in Pearl (1988) and Pearl (2000) suggest that the net-  
220 works only need a relatively small amount of marginal probabilities for nodes  
221 that have no incoming arcs and a set of conditional probabilities for each node  
222 having one or more incoming arcs. The nodes form the driving components of  
223 a network and the arcs define the interactive influences that drive a particular  
224 process. Under these assumptions of influences the joint probability distribution  
225 of the whole network or a part of it can be obtained via a special factorization  
226 that uses the concept of direct influence and through dependence rules that de-  
227 fine d-connectivity/separability as mentioned in Charniak (1991) and Needham  
228 et al. (2007). This is illustrated through a simple example in Roehrig (1996).

229 The Bayesian networks work by estimating the posterior probability of the  
230 model given the data set. This estimation is usually referred to as the Bayesian  
231 score of the model conditioned on the data set. Mathematically, let  $\mathcal{S}$  represent  
232 the model given the data  $\mathcal{D}$  and  $\xi$  is the background knowledge. Then according  
233 to the Bayes Theorem Bayes and Price (1763):

$$\begin{aligned}\mathcal{P}(\mathcal{S}|\mathcal{D}, \xi) &= \frac{\mathcal{P}(\mathcal{S} \cap \mathcal{D}|\xi)}{\mathcal{P}(\mathcal{D}|\xi)} \\ &= \frac{\mathcal{P}(\mathcal{S}|\xi) \times \mathcal{P}(\mathcal{D}|\mathcal{S}, \xi)}{\mathcal{P}(\mathcal{D}|\xi)} \\ \text{posterior} &= \frac{\text{prior} \times \text{likelihood}}{\text{constant}}\end{aligned}\tag{1}$$

234 Thus the Bayesian score is computed by evaluating the **posterior** distribution  
235  $\mathcal{P}(\mathcal{S}|\mathcal{D}, \xi)$  which is proportional to the **prior** distribution of the model  $\mathcal{P}(\mathcal{S}|\xi)$   
236 and the **likelihood** of the data given the model  $\mathcal{P}(\mathcal{D}|\mathcal{S}, \xi)$ . It must be noted  
237 that the background knowledge is assumed to be independent of the data. Next,  
238 since the evaluation of probabilities require multiplications a simpler way is to  
239 take logarithmic scores which boils down to addition. Thus the estimation takes  
240 the form:

$$\begin{aligned}\log \mathcal{P}(\mathcal{S}|\mathcal{D}, \xi) &= \log \mathcal{P}(\mathcal{S}|\xi) + \log \mathcal{P}(\mathcal{D}|\mathcal{S}, \xi) - \log \mathcal{P}(\mathcal{D}|\xi) \\ &= \log \mathcal{P}(\mathcal{S}|\xi) + \log \mathcal{P}(\mathcal{D}|\mathcal{S}, \xi) + \text{constant}\end{aligned}\tag{2}$$

241 Finally, the likelihood of the function can be evaluated by averaging over all  
242 possible local conditional distributions parameterized by  $\theta_i$ 's that depict the  
243 conditioning of parents. This is equated via:

$$\begin{aligned}\mathcal{P}(\mathcal{D}|\mathcal{S}, \xi) &= \int_{\theta_1} \dots \int_{\theta_n} \mathcal{P}(\mathcal{D}, \theta_i|\mathcal{S}) d\theta_i \\ &= \int_{\theta_1} \dots \int_{\theta_n} \mathcal{P}(\mathcal{D}|\theta_i \mathcal{S}) \mathcal{P}(\theta_i|\mathcal{S}) d\theta_i\end{aligned}\tag{3}$$

244 Work on biological systems that make use of Bayesian networks can also be  
245 found in Friedman et al. (2000), Hartemink et al. (2001), Sachs et al. (2002),  
246 Sachs et al. (2005) and Peer et al. (2001). Bayesian networks are good in gen-  
247 erating network structures and testing a targeted hypothesis which confine the  
248 experimenter to derive causal inferences Brent and Lok (2005). But a major  
249 disadvantage of the Bayesian networks is that they rely heavily on the condi-  
250 tional probability distributions which require good sampling of datasets and are  
251 computationally intensive. On the other hand, these networks are quite robust  
252 to the existence of the unobserved variables and accommodates noisy datasets.  
253 They also have the ability to combine heterogeneous data sets that incorporate  
254 different modalities.

255 In Sinha (2014), simple static Bayesian Network models have been developed  
256 with an aim to show how • incorporation of heterogeneous data can be done to  
257 increase prediction accuracy of test samples • prior biological knowledge can be  
258 embedded to model biological phenomena behind the Wnt pathway in colorectal  
259 cancer • to test the hypothesis regarding direct correspondence of active state



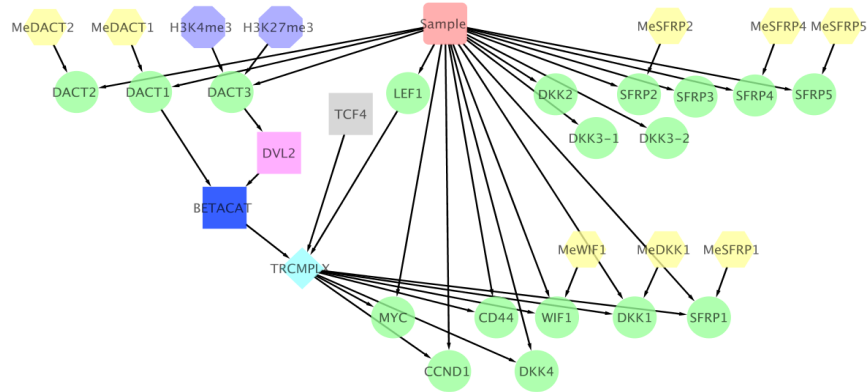

Figure 2: Influence diagram of  $\mathcal{M}_{PBK+EI}$  contains partial prior biological knowledge and epigenetic information in the form of methylation and histone modification. Diagram drawn using CYTOSCAPE Shannon et al. (2003). In this model the state of *Sample* is distinguished from state of *TRCMPLX* that constitutes the Wnt pathway.

260 of  $\beta$ -catenin based transcription complex and the state of the test sample via  
 261 segregation of nodes in the directed acyclic graphs of the proposed models and  
 262 • inferences can be made regarding the hidden biological relationships between  
 263 a particular gene and the  $\beta$ -catenin transcription complex. This work uses  
 264 MATLAB implemented BN toolbox from Murphy et al. (2001).

265 *2.4. Intuition behind the causal semantics of the biologically inspired Bayesian*  
 266 *network*

267 The NB model Ver assumes that the activation (inactivation) of  $\beta$ -catenin  
 268 based transcription complex is equivalent to the fact that the sample is cancerous  
 269 (normal). This assumption needs to be tested and Sinha (2014) proposes a  
 270 newly improvised models based on prior biological knowledge and epigenetic  
 271 information regarding the signaling pathway with the assumption that sample  
 272 prediction may not always mean that the  $\beta$ -catenin based transcription complex  
 273 is activated. These assumptions are incorporated by inserting another node  
 274 of *Sample* for which gene expression measurements were available. This is  
 275 separate from the *TRCMPLX* node that influences a particular set of known  
 276 genes in the human colorectal cancer. For those genes whose relation with  
 277 the *TRCMPLX* is currently not known or biologically affirmed, indirect paths  
 278 through the *Sample* node to the *TRCMPLX* exist, technical aspect of which  
 279 is described next.

280 For those factors whose relations were not yet confirmed but known to be  
 281 involved in the pathway, the causal arcs were segregated via a latent variable  
 282 introduced into the Bayesian network. The latent variable in the form of *Sample*  
 283 (see figure 2) is extremely valuable as it connects the factors whose relations have  
 284 not been confirmed till now, to factors whose influences have been confirmed

285 in the pathway. Finally, the introduction of latent variable in a causal model  
286 opens the avenue to assume the presence of measurements that haven't been  
287 recorded. Intuitively, for cancer samples the hidden measurements might be  
288 different from those for normal samples. The connectivity of factors through  
289 the variable provides an important route to infer biological relations.

290 Since all gene expressions have been measured from a sample of subjects  
291 the expression of genes is conditional on the state of the *Sample*. Here both  
292 tumorous and normal cases are present in equal amounts. The transcription  
293 factor *TRCMPLX* under investigation is known to operate with the help of  
294 interaction between  $\beta$ -catenin with *TCF4* and *LEF1* Waterman (2004), Kriegl  
295 et al. (2010). It is also known that the regions in the TSS of *MYC* Yochum  
296 (2011), *CCND1* Schmidt-Ott et al. (2007), *CD44* Kanwar et al. (2010), *SFRP1*  
297 Caldwell et al. (2006), *WIF1* Reguart et al. (2004), *DKK1* González-Sancho  
298 et al. (2004) and *DKK4* Pendas-Franco et al. (2008), Baehs et al. (2009) contain  
299 factors that have affinity to  $\beta$ -catenin based *TRCMPLX*. Thus expression of  
300 these genes are shown to be influenced by *TRCMPLX*, in figure 2.

301 Roles of *DKK2* Matsui et al. (2009) and *DKK3* Zitt et al. (2008), Veeck and  
302 Dahl (2012) have been observed in colorectal cancer but their transcriptional  
303 relation with  $\beta$ -catenin based *TRCMPLX* is not known. Similarly, *SFRP2* is  
304 known to be a target of *Pax2* transcription factor and yet it affects the  $\beta$ -catenin  
305 Wnt signaling pathway Brophy et al. (2003). Similarly, *SFRP4* Feng Han et al.  
306 (2006), Huang et al. (2010) and *SFRP5* Suzuki et al. (2004) are known to have  
307 affect on the Wnt pathway but their role with *TRCMPLX* is not well studied.  
308 *SFRP3* is known to have a different structure and function with respect to the  
309 remaining *SFRPx* gene family Hoang et al. (1996). Also, the role of *DACT2* is  
310 found to be conflicting in the Wnt pathway Kivimäe et al. (2011). Thus for all  
311 these genes whose expression mostly have an extracellular affect on the pathway  
312 and information regarding their influence on  $\beta$ -catenin based *TRCMPLX* node  
313 is not available, an indirect connection has been made through the *Sample* node.  
314 This connection will be explained at the end of this section.

315 Lastly, it is known that concentration of *DVL2* (a member of Disheveled  
316 family) is inversely regulated by the expression of *DACT3* Jiang et al. (2008).  
317 High *DVL2* concentration and suppression of *DACT1* leads to increase in stabi-  
318 lization of  $\beta$ -catenin which is necessary for the Wnt pathway to be active Jiang  
319 et al. (2008). But in a recent development Yuan et al. (2012) it has been found  
320 that expression of *DACT1* positively regulates  $\beta$ -catenin. Both scenarios need  
321 to be checked via inspection of the estimated probability values for  $\beta$ -catenin  
322 using the test data. Thus there exists direct causal relations between parent  
323 nodes *DACT1* and *DVL2* and child node,  $\beta$ -catenin. Influence of methylation  
324 (yellow hexagonal) nodes to their respective gene (green circular) nodes represent  
325 the affect of methylation on genes. Influence of histone modifications in  
326 *H3K27me3* and *H3K4me3* (blue octagonal) nodes to *DACT3* gene node represents  
327 the affect of histone modification on *DACT3*. The  $\beta$ -catenin (blue square)  
328 node is influenced by concentration of *DVL2* (depending on the expression state  
329 of *DACT3*) and behavior of *DACT1*.

330 The aforementioned established prior causal biological knowledge is imposed

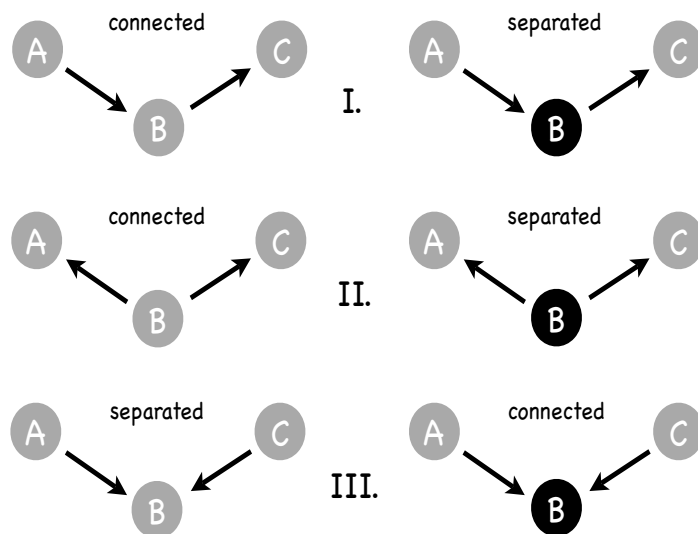

Figure 3: Cases for d-connectivity and d-separation. Black (Gray) circles mean evidence is available (not available) regarding a particular node.

331 in the Bayesian network model with the aim to computationally reveal unknown  
 332 biological relationships. The influence diagram of this model is shown in figure  
 333 2 with nodes on methylation and histone modification.

334 In order to understand indirect connections further it is imperative to know  
 335 about **d-connectivity/separability**. In a BN model this connection is estab-  
 336 lished via the principle of **d-connectivity** which states that nodes are *connected*  
 337 in a path when there exists no node in the path that has more than one incom-  
 338 ing influence edge or there exists nodes in path with more than one incoming  
 339 influence edge which are observed (i.e evidence regarding such nodes is avail-  
 340 able) Charniak (1991). Conversely, via principle of **d-separation** nodes are  
 341 *separated* in a path when there exists nodes in the path that have more than  
 342 one incoming influence edge or there exists nodes in the path with at most one  
 343 incoming influence edge which are observed (i.e evidence regarding such nodes  
 344 is available). Figure 3 represents three different cases of connectivity and sep-  
 345 aration between nodes  $\mathcal{A}$  and  $\mathcal{C}$  when the path between them passes through  
 346 node  $\mathcal{B}$ . Connectivity or dependency exists between nodes  $\mathcal{A}$  and  $\mathcal{C}$  when •  
 347 evidence is not present regarding node  $\mathcal{B}$  in the left graphs of I. and II. in figure  
 348 3 or • evidence is present regarding node  $\mathcal{B}$  in the right graph of III. in figure  
 349 3. Conversely, separation or independence exists between nodes  $\mathcal{A}$  and  $\mathcal{C}$  when  
 350 • evidence is present regarding node  $\mathcal{B}$  in the right graphs of I. and II. in figure  
 351 3 or • evidence is not present regarding node  $\mathcal{B}$  in the left graph of III. in figure  
 352 3.

353 It would be interesting to know about the behaviour of *TRCMPLX* given  
354 the evidence of state of *SFRP3*. To reveal such information paths must ex-  
355 ist between these nodes. It can be seen that there are multiple paths between  
356 *TRCMPLX* and *SFRP2* in the BN model in figure 2. These paths are enu-  
357 merated as follows:

- 358 1. *SFRP3*, *Sample*, *SFRP1*, *TRCMPLX*
- 359 2. *SFRP3*, *Sample*, *DKK1*, *TRCMPLX*
- 360 3. *SFRP3*, *Sample*, *WIF1*, *TRCMPLX*
- 361 4. *SFRP3*, *Sample*, *CD44*, *TRCMPLX*
- 362 5. *SFRP3*, *Sample*, *DKK4*, *TRCMPLX*
- 363 6. *SFRP3*, *Sample*, *CCND1*, *TRCMPLX*
- 364 7. *SFRP3*, *Sample*, *MYC*, *TRCMPLX*
- 365 8. *SFRP3*, *Sample*, *LEF1*, *TRCMPLX*
- 366 9. *SFRP3*, *Sample*, *DACT3*, *DVL2*,  $\beta$ -catenin, *TRCMPLX*
- 367 10. *SFRP3*, *Sample*, *DACT1*,  $\beta$ -catenin, *TRCMPLX*

368 Knowledge of evidence regarding nodes of *SFRP1* (path 1), *DKK1* (path 2),  
369 *WIF1* (path 3), *CD44* (path 4), *DKK4* (path 5), *CCND1* (path 6) and *MYC*  
370 (path 7) makes *Sample* and *TRCMPLX* dependent or d-connected. Further,  
371 no evidence regarding state of *Sample* on these paths instigates dependency or  
372 connectivity between *SFRP3* and *TRCMPLX*. On the contrary, evidence re-  
373 garding *LEF1*, *DACT3* and *DACT1* makes *Sample* (and child nodes influenced  
374 by *Sample*) independent or d-separated from *TRCMPLX* through paths (8) to  
375 (10). Due to the dependency in paths (1) to (7) and the given state of *SFRP3*  
376 (i.e evidence regarding it being active or passive), the BN uses these paths dur-  
377 ing inference to find how *TRCMPLX* might behave in normal and tumorous  
378 test cases. Thus, exploiting the properties of d-connectivity/separability, impos-  
379 ing a biological structure via simple yet important prior causal knowledge and  
380 incorporating epigenetic information, BN help in inferring many of the unknown  
381 relation of a certain gene expression and a transcription complex.

## 382 2.5. The logarithmic psychophysical law

383 Masin et al. (2009) states the Weber's law as follows -

384 Consider a sensation magnitude  $\gamma$  determined by a stimulus mag-  
385 nitude  $\beta$ . Fechner (1860) (vol 2, p. 9) used the symbol  $\Delta\gamma$  to denote  
386 a just noticeable sensation increment, from  $\gamma$  to  $\gamma + \Delta\gamma$ , and the  
387 symbol  $\Delta\beta$  to denote the corresponding stimulus increment, from  $\beta$   
388 to  $\beta + \Delta\beta$ . Fechner (1860) (vol 1, p. 65) attributed to the Ger-  
389 man physiologist Ernst Heinrich Weber the empirical finding Weber  
390 (1834) that  $\Delta\gamma$  remains constant when the relative stimulus incre-  
391 ment  $\frac{\Delta\beta}{\beta}$  remains constant, and named this finding Weber's law.  
392 Fechner (1860) (vol 2, p. 10) underlined that Weber's law was em-  
393 pirical.

It has been found that Bernoulli's principle Bernoulli (1738) is different from Weber's law Weber (1834) in that it refers to  $\Delta\gamma$  as any possible increment in  $\gamma$ , while the Weber's law refers only to just noticeable increment in  $\gamma$ . Masin et al. (2009) shows that Weber's law is a special case of Bernoulli's principle and can be derived as follows - Equation 4 depicts the Bernoulli's principle and increment in sensation represented by  $\Delta\gamma$  is proportional to change in stimulus represented by  $\Delta\beta$ .

$$\gamma = b \times \log \frac{\beta}{\alpha} \quad (4)$$

where  $b$  is a constant and  $\alpha$  is a threshold. To evaluate the increment, the following equation 5 and the ensuing simplification gives -

$$\Delta\gamma = b \times \log \frac{\beta + \Delta\beta}{\alpha} - b \times \log \frac{\beta}{\alpha} = b \times \log \left( \frac{\beta + \Delta\beta}{\beta} \right) = b \times \log \left( 1 + \frac{\Delta\beta}{\beta} \right) \quad (5)$$

Since  $b$  is a constant, equation 5 reduces to

$$\Delta\gamma \circ \frac{\Delta\beta}{\beta} \quad (6)$$

394 were  $\circ$  means "is constant when there is constancy of" from Masin et al. (2009).  
 395 The final equation 6 is a formulation of Weber's laws in wordings and thus  
 396 Bernoulli's principles imply Weber's law as a special case. Using Fechner (1860)  
 397 derivation, it is possible to show the relation between Bernoulli's principles and  
 398 Weber's law. Starting from the last line of equation 5, the following yields the  
 399 relation.

$$\begin{aligned} \Delta\gamma &= b \times \log \left( 1 + \frac{\Delta\beta}{\beta} \right) \implies e^{\Delta\gamma} = e^{b \times \log \left( 1 + \frac{\Delta\beta}{\beta} \right)} \\ k_p &= e^{\log \left( 1 + \frac{\Delta\beta}{\beta} \right)^b}; \text{ were } k_p = e^{\Delta\gamma} \implies k_p = \left( 1 + \frac{\Delta\beta}{\beta} \right)^b; \text{ since } e^{\log(x)} = x \\ \sqrt[b]{k_p} &= 1 + \frac{\Delta\beta}{\beta} \\ k_q - 1 &= \frac{\Delta\beta}{\beta}; \text{ were } \sqrt[b]{k_p} = k_q \implies k_r = \frac{\Delta\beta}{\beta}; \text{ the weber's law s.t. } k_r = \sqrt[b]{e^{\Delta\gamma}} - 1 \end{aligned} \quad (7)$$

400 Equation 6 holds true given the last line of equation 7. In the current study,  
 401 observation of deviation recorded in predicted values of state of *TRCMPLX*  
 402 conditional on gene evidences show crude logarithmic behaviour which might  
 403 bolster Weber's law and Bernoulli's principles. But it must be noted that these  
 404 observations are made on static causal models and observation of the same  
 405 behaviour in dynamical setting would add more value.

### 406 3. Materials and methods

407 The models purported by Sinha (2014) involving the biological knowledge  
 408 as well as epigenetic information depicted by  $\mathcal{M}_{PBK+EI}$  and biological knowl-

409 edge excluding epigenetic information  $\mathcal{M}_{PBK}$  were used to predict the state of  
410 *TRCMPLX* given the gene evidences. Figure 2 depicts the model  $\mathcal{M}_{PBK+EI}$ .  
411 The predictions were recorded over the varying effect of *TRCMPLX* on gene  
412 regulations via assignment of different values to conditional probability tables  
413 (cpt) of *TRCMPLX* while initializing the aforementioned BN models. This  
414 varying effect is represented by the term ETGN in Sinha (2014).

415 As a recapitulation, the design of the experiment is a simple 2-holdout ex-  
416 periment where one sample from the normal and one sample from the tumorous  
417 are paired to form a test dataset. Excluding the pair formed in an iteration of  
418 2-hold out experiment the remaining samples are considered for training of a  
419 BN model. Thus in a data set of 24 normal and 24 tumorous cases obtained  
420 from Jiang et al. (2008), a training set will contain 46 samples and a test set  
421 will contain 2 samples (one of normal and one of tumor). This procedure is  
422 repeated for every normal sample which is combined with each of the tumorous  
423 sample to form a series of test datasets. In total there will be 576 pairs of test  
424 data and 576 instances of training data. Note that for each test sample in a  
425 pair, the expression value for a gene is discretized using a threshold computed  
426 for that particular gene from the training set. Computation of the threshold  
427 has been elucidated in Sinha (2014). This computation is repeated for all genes  
428 per test sample. Based on the available evidence from the state of expression of  
429 all genes, which constitute the test data, inference regarding the state of both  
430 the *TRCMPLX* and the test sample is made. These inferences reveal informa-  
431 tion regarding the activation state of the *TRCMPLX* and the state of the test  
432 sample. Finally, for each gene  $g_i$ , the conditional probability  $\Pr(g_i = \text{active} | g_k$   
433 evidence)  $\forall k$  genes. Note that these probabilities are recorded for both normal  
434 and tumor test samples.

435 Three observations are presented in this manuscript. The **first observa-**  
436 **tion** is regarding the logarithmic deviations in prediction of activation status  
437 of *TRCMPLX* conditional on gene expression evidences. The **second obser-**  
438 **vation** is preservation of some gene gene interactions across different strength  
439 of beliefs concerning the affect of *TRCMPLX*. To observe these preservations,  
440 first the gene gene interactions have to be constructed from the predicted con-  
441 ditional probabilities of one gene given the evidence of another gene (for all  
442 gene evidences taken separately). After the construction, further preprocessing  
443 is required before the gene-gene interaction network can be inferred. Finally,  
444 the **third observation** is to check whether these laws are prevalent among the  
445 gene-gene interactions in the network or not.

## 446 4. Results and discussion on observation 1

### 447 4.1. Logarithmic-power deviations in predictions of $\beta$ -catenin transcription com- 448 plex

449 Let  $\gamma$  be  $\Pr(\text{TRCMPLX} = \text{active} | \text{all gene evidences})$ ,  $\beta$  be the assigned cpt  
450 value of *TRCMPLX* during initialization of the Bayesian network models and  
451  $\Delta\beta$  be the deviation in the assigned values of *TRCMPLX* during initialization.

Deviation study for model  $\mathcal{M}_{PBK+EI}$

| $\beta$ | $\Delta\beta$ | $\frac{\Delta\beta}{\beta}$ | $\log(1 + \frac{\Delta\beta}{\beta})$ | $\Delta\gamma$ in Normal | $\Delta\gamma$ in Tumor |
|---------|---------------|-----------------------------|---------------------------------------|--------------------------|-------------------------|
| 0.8     | 0.1           | 0.125                       | 0.117783                              | 0.03055427               | 0.09151151              |
| 0.7     | 0.1           | 0.1428571                   | 0.1335314                             | 0.01423754               | 0.09086427              |
| 0.6     | 0.1           | 0.1666667                   | 0.1541507                             | 0.004384244              | 0.08052346              |
| 0.5     | 0.1           | 0.2                         | 0.1823216                             | 0.0005872203             | 0.07294716              |
| 0.8     | 0.1           | 0.125                       | 0.117783                              | 0.03055427               | 0.09151151              |
| 0.7     | 0.2           | 0.2857143                   | 0.2513144                             | 0.04479181               | 0.1823758               |
| 0.6     | 0.3           | 0.5                         | 0.4054651                             | 0.04917605               | 0.2628992               |
| 0.5     | 0.4           | 0.8                         | 0.5877867                             | 0.04976327               | 0.3358464               |

Table 1: Deviation study for model  $\mathcal{M}_{PBK+EI}$ .  $\Delta\gamma$  - mean value of  $\Pr(TRCMPLX = \text{active}|\forall ge_i \text{ evidences})$  over all runs,  $\gamma$  -  $\Pr(TRCMPLX = \text{active}|\text{all gene evidences})$ ,  $\beta$  - the assigned cpt value of  $TRCMPLX$  during initialization of the Bayesian network models and  $\Delta\beta$  - the deviation in the assigned values of  $TRCMPLX$  during initialization.

452 To compute  $\Delta\gamma$ , the 576 predictions of  $\gamma$  observed at  $\beta = 90\%$  is subtracted  
 453 from the 576 predictions of  $\gamma$  observed at  $\beta = 80\%$  and a mean of the deviations  
 454 recorded. This mean becomes  $\Delta\gamma$ . The procedure is computed again for  
 455 different value of  $\beta$ . In this manuscript, the effect of constant and incremental  
 456 deviations are observed. Tables 1 and 2 represent the deviations for models  
 457  $\mathcal{M}_{PBK+EI}$  and  $\mathcal{M}_{PBK}$ , respectively.

458 Figures 4, 5, 6 and 7 show the deviations represented in tables 1 and 2. Note  
 459 that the numbers depicted in the tables are scaled in a nonuniform manner for  
 460 observational purpose in the figures. Unscaled values are represented under the  
 461 last two columns on the right of tables 1 and 2. Before reading the graphs, note  
 462 that red indicates deviation of mean of  $\Pr(TRCMPLX = \text{active}|\forall ge_i \text{ evidences})$   
 463 in normal test samples, blue indicates deviation of mean of  $\Pr(TRCMPLX =$   
 464  $\text{active}|\forall ge_i \text{ evidences})$  in tumor case, green indicates deviations in Weber's law  
 465 and cyan indicates deviations in Bernoulli's law.

466 For the case of constant deviations (figure 4) in model  $\mathcal{M}_{PBK+EI}$ , it was  
 467 observed that deviations in activation of  $TRCMPLX$  conditional on gene ev-  
 468 idences for the tumor test samples showed a logarithmic behaviour and were  
 469 directly proportional to the negative of both the Weber's and Bernoulli's law.  
 470 This can be seen by the blue curve almost following the green and cyan curves.  
 471 For the case of deviations in activation of  $TRCMPLX$  conditional on gene ev-  
 472 idences for the normal test samples showed an exponential behaviour and were  
 473 proportional to negative of both the Weber's and Bernoulli's law. Similar be-  
 474 haviour was observed for all the coloured curves in case of incremental deviations  
 475 as shown in figure 5. The exponential behaviour for activation of  $TRCMPLX$   
 476 being active conditional on gene evidences correctly supports to the last line of

### Deviation study for model $\mathcal{M}_{PBK}$

| $\beta$ | $\Delta\beta$ | $\frac{\Delta\beta}{\beta}$ | $\log(1 + \frac{\Delta\beta}{\beta})$ | $\Delta\gamma$ in Normal | $\Delta\gamma$ in Tumor |
|---------|---------------|-----------------------------|---------------------------------------|--------------------------|-------------------------|
| 0.8     | 0.1           | 0.125                       | 0.117783                              | 0.1400355                | 0.1097089               |
| 0.7     | 0.1           | 0.1428571                   | 0.1335314                             | 0.06442086               | 0.1877266               |
| 0.6     | 0.1           | 0.1666667                   | 0.1541507                             | 0.01762791               | 0.06204044              |
| 0.5     | 0.1           | 0.2                         | 0.1823216                             | 0.01393517               | 0.1718198               |
| 0.8     | 0.1           | 0.125                       | 0.117783                              | 0.1400355                | 0.1097089               |
| 0.7     | 0.2           | 0.2857143                   | 0.2513144                             | 0.2044564                | 0.2974356               |
| 0.6     | 0.3           | 0.5                         | 0.4054651                             | 0.2220843                | 0.359476                |
| 0.5     | 0.4           | 0.8                         | 0.5877867                             | 0.2360195                | 0.5312958               |

Table 2: Deviation study for model  $\mathcal{M}_{PBK}$ .  $\Delta\gamma$  - mean value of  $\Pr(TRCMPLX = \text{active}|\forall ge_i \text{ evidences})$  over all runs,  $\gamma$  -  $\Pr(TRCMPLX = \text{active}|\text{all gene evidences})$ ,  $\beta$  - the assigned cpt value of  $TRCMPLX$  during initialization of the Bayesian network models and  $\Delta\beta$  - the deviation in the assigned values of  $TRCMPLX$  during initialization.

477 equation 7 which is the derivation of Weber’s law from Bernoulli’s equation. It  
 478 actually point to Fechner’s derivation of Weber’s law from logarithmic formula-  
 479 tion.

480 For model  $\mathcal{M}_{PBK}$ , the above observations do not yield consistent behaviour.  
 481 In figure 6, for the case of constant deviations, only the deviations in activation  
 482 of  $TRCMPLX$  conditional on gene evidences for normal test samples expo-  
 483 nential in nature and were found to be directly proportional to the negative  
 484 of both the Weber’s and Bernoulli’s law. But the deviations in activation of  
 485  $TRCMPLX$  conditional on gene evidences in tumor test samples show noisy  
 486 behaviour. But this observation is not the case in incremental deviations for  
 487 the same model. For the case of incremental deviations as represented in figure  
 488 7, the deviations in activation of  $TRCMPLX$  conditional on gene evidences  
 489 is directly proportional to both the Weber’s and Bernoulli’s law. The figure  
 490 actually represent the plots with inverted values i.e negative values. A primary  
 491 reason for this behaviour might be that  $\mathcal{M}_{PBK}$  does not capture and constrain  
 492 the network as much as  $\mathcal{M}_{PBK+EI}$  which include epigenetic information. This  
 493 inclusion of heterogeneous information adds more value to the biologically in-  
 494 spired network and reveals the hidden natural laws occurring in the signaling  
 495 pathway in both normal and tumor cases.

#### 496 4.2. Intuition behind the curve behaviour

497 Lastly, the intuitive idea behind the behaviour of the curves generated from  
 498 constant deviation in table 1 is as follows. It is expected that  $\Pr(TRCMPLX =$   
 499  $\text{active}|\text{all gene evidences})$  is low (high) in the case of Normal (Tumor) samples.  
 500 The change  $\Delta\Pr(TRCMPLX = \text{active}|\text{all gene evidences})$  jumps by power of



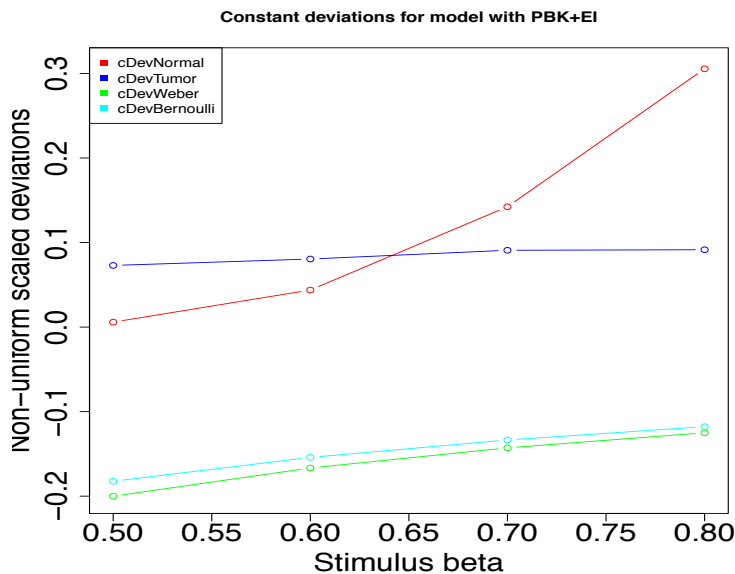

Figure 4: Constant deviations in  $\beta$  i.e *ETGN* and corresponding deviations in  $\Pr(\text{TRCMPLX} = \text{active} | \forall g e_i \text{ evidences})$  for both normal and tumor test samples. Corresponding Weber and Bernoulli deviations are also recorded. Note that the plots and the y-axis depict scaled deviations to visually analyse the observations. The model used is  $\mathcal{M}_{PBK+EI}$ . Red - constant deviation in Normal, constant deviation in Tumor, Green - constant deviation in Weber's law, Cyan - constant deviation in Bernoulli's law.

501 10 as the  $\beta$  values change from 50% to 90% in Normal cases. It can be observed  
 502 from the table that there are low deviations in  $\Pr(\text{TRCMPLX} = \text{active} | \text{all}$   
 503  $\text{gene evidences})$  when  $\beta$  is low i.e the effect of transcription complex is low and  
 504 high deviations in  $\Pr(\text{TRCMPLX} = \text{active} | \text{all gene evidences})$  when  $\beta$  is high  
 505 i.e the effect of transcription complex is high. But it should be noted that the  
 506 deviations still tend to be small. This implies that the *TRCMPLX* is switched  
 507 off at a constant rate. Thus changes in  $\beta$  leads to exponential curves as in the  
 508 formulation  $\frac{\Delta\beta}{\beta}$ ,  $\Delta\beta \rightarrow 0$  and  $\beta \rightarrow \infty$ .

509 In tumor cases,  $\Delta\Pr(\text{TRCMPLX} = \text{active} | \text{all gene evidences})$  behaves near  
 510 to logarithmic curve as  $\beta$  increases from 50% to 90%. The deviations increase in  
 511 a slow monotonic way as  $\beta$  increases. Finally, the ratio  $\frac{\Delta\beta}{\beta}$  shows monotonically  
 512 increasing behaviour as  $\Delta\beta$  increases proportionally with  $\beta$ . This means that  
 513 in tumor samples the rate of transcription increases or the effect of rate of tran-  
 514 scription complex increases monotonically as  $\beta$  increases. This points to the fold  
 515 change in  $\beta$ -*catenin* concentration that might be influencing the transcription  
 516 rate of the transcription complex. In normal case, the  $\beta$ -*catenin* concentration  
 517 remains constant. Due to this, changes in the rate of transcription by the tran-  
 518 scription complex might remains constant and near to zero. Change in  $\beta$  values  
 519 that is the change in initialization of cpt values of transcription complex causes

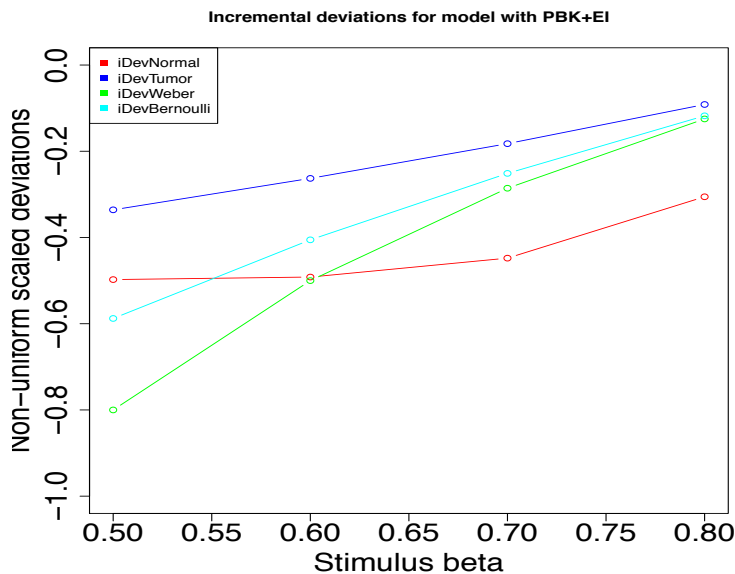

Figure 5: Incremental deviations in  $\beta$  i.e. *ETGN* and corresponding deviations in  $\Pr(\text{TRC}MPLX = \text{active} | \forall ge_i \text{ evidences})$  for both normal and tumor test samples. Corresponding Weber and Bernoulli deviations are also recorded. Note that the plots and the y-axis depict scaled deviations to visually analyse the observations. The model used is  $\mathcal{M}_{PBK+EI}$ . Red - incremental deviation in Normal, incremental deviation in Tumor, Green - incremental deviation in Weber's law, Cyan - incremental deviation in Bernoulli's law.

520 the logarithmic curve in deviations of prediction of transcription complex.  
 521 Finally, these observations present a crude yet important picture regarding  
 522 the downstream transcriptional behaviour of signaling pathway in case of col-  
 523 orectal cancer. Though the current model does not measure the fold changes in  
 524 the concentration levels of  $\beta$ -catenin, it can help in measuring the deviations  
 525 in activity of the transcription complex conditional on the gene evidences by  
 526 observing the deviations in the strength of belief assigned as priors in the prob-  
 527 ability tables of the node representing the transcription complex of the network.  
 528 Thus sensitivity analysis facilitates in observing such natural phenomena at  
 529 computational level. In context of the work by Goentoro and Kirschner (2009),  
 530 the presented results are crude in terms of static observations yet they show  
 531 corresponding behaviour of transcriptional activity in terms of psychophysical  
 532 laws. Further investigations using dynamic models might reveal more informa-  
 533 tion in comparison to the static models used in Sinha (2014). The observations  
 534 presented here bolster the existence of behavioural phenomena in terms of log-  
 535 arithmic laws.

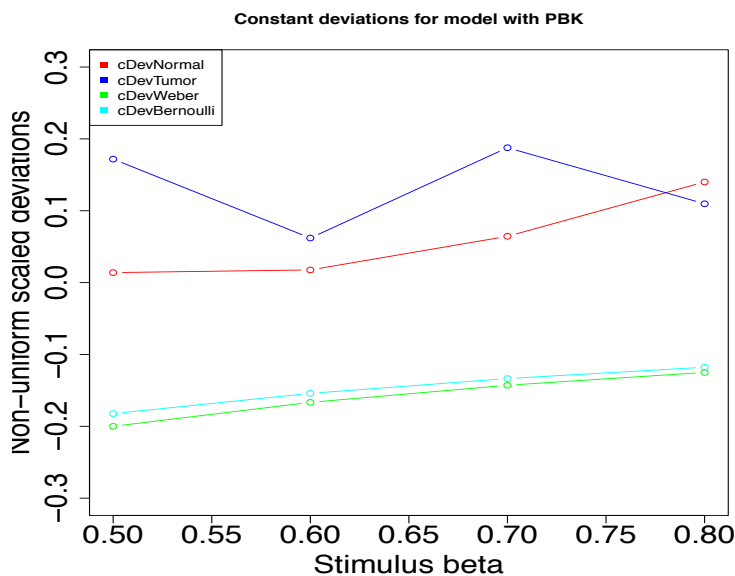

Figure 6: Constant deviations in  $\beta$  i.e *ETGN* and corresponding deviations in  $\Pr(\text{TRCMPLX} = \text{active} | \forall g_i \text{ evidences})$  for both normal and tumor test samples. Corresponding Weber and Bernoulli deviations are also recorded. Note that the plots and the y-axis depict scaled deviations to visually analyse the observations. The model used is  $\mathcal{M}_{PBK}$ . Red - constant deviation in Normal, constant deviation in Tumor, Green - constant deviation in Weber's law, Cyan - constant deviation in Bernoulli's law.

## 536 5. Preservation of gene gene interactions

537 The second part of this study was to find interactions between two genes  
 538 by observing the conditional probability of activation status of one gene given  
 539 the evidence of another gene. Let  $g$  be a gene. To obtain the results, two steps  
 540 need to be executed in a serial manner. The first step is to construct gene  
 541 gene interactions based on the available conditional probabilities denoted by  
 542  $\Pr(g_i = \text{active/repressed} | g_k \text{ evidence}) \forall k$  genes. The conditional probabilities  
 543 are inferred using the junction tree algorithm that employs two-pass message  
 544 passing scheme. Example code and implementations of the same can be found  
 545 in Murphy et al. (2001). The steps for constructing the gene gene interactions  
 546 based on these conditional probabilities are documented in the Appendix. The  
 547 second step is to infer gene gene interaction network based purely on reversible  
 548 interactions. Note that networks are inferred for gene evidences using normal  
 549 and tumor test samples separately.

550 Finally, once the interaction network is ready, the computational empirical  
 551 estimates for deviations in gene-gene interaction is recorded and observation  
 552 on the prevalence of psychophysical laws in these interactions is discussed. An  
 553 important point that needs to be kept in mind is that the inferred interaction  
 554 network differs based on the choice of the threshold involved (which is a

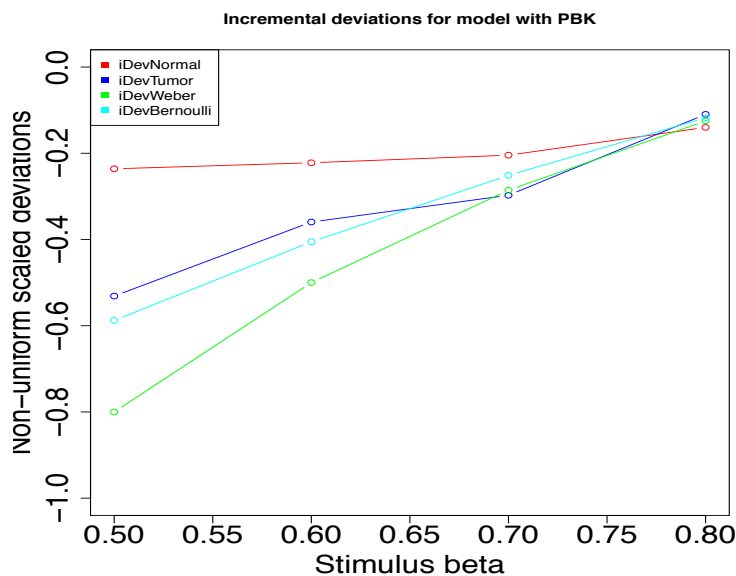

Figure 7: Incremental deviations in  $\beta$  i.e. *ETGN* and corresponding deviations in  $\Pr(\text{TRCMPLX} = \text{active} | \forall g_{e_i} \text{ evidences})$  for both normal and tumor test samples. Corresponding Weber and Bernoulli deviations are also recorded. Note that the plots and the y-axis depict scaled deviations to visually analyse the observations. The model used is  $\mathcal{M}_{PBK}$ . Red - incremental deviation in Normal, incremental deviation in Tumor, Green - incremental deviation in Weber's law, Cyan - incremental deviation in Bernoulli's law.

555 computational issue) but the underlying psychophysical laws remain unchanged  
 556 (which is a natural phenomena irrespective of the components involved). Thus  
 557 the while reading the observations on the psychophysical laws, readers must not  
 558 get confused regarding plots made for interactions from different networks.

### 559 5.1. Constructing gene-gene interactions

560 Gene interactions are constructed by labeling the inferred conditional proba-  
 561 bility of activation of  $g_j$  given the state of  $g_i$ , for all  $j$ 's &  $i$ 's. Here labels refer to  
 562 assigning  $\langle \rangle$  for an activated gene and  $|$  for repressed gene. Thus the following  
 563 possible combinations can be inferred -  $g_j \langle \rangle - \langle \rangle g_i$ ,  $g_j | - | g_i$ ,  $g_j \langle \rangle - | g_i$   
 564 and  $g_j | - \langle \rangle g_i$ . Note that all interactions are basically depicting the degree  
 565 of belief in the state of  $g_i$  given or conditional on  $g_j$  i.e.  $\Pr(g_i | g_j)$ . The label  
 566 related to  $g_i$  is derived by discretizing  $\Pr(g_i | g_j)$  with respect to a weighted mean  
 567 or the arbitrary value of 0.5. In any interaction, the label associated with  $g_j$   
 568 is the evidence and the label associated with  $g_i$  is the predicted conditional  
 569 probability. Thus there will always exist two way interactions corresponding to  
 570  $\Pr(g_j | g_i)$  and  $\Pr(g_i | g_j)$  in a Normal case. Similar interactions can be inferred for  
 571 the Tumor case. Which interactions to select is based on criteria of reversibility  
 572 and duplication, which is addressed later. To reiterate a final note regarding the

| SFRP3 activation status apropos gene evidences in Normal and Tumor samples using $\theta = 0.5$                              |        |                 |                 |                 |                 |                 |                 |                 |                 |                    |                    |
|------------------------------------------------------------------------------------------------------------------------------|--------|-----------------|-----------------|-----------------|-----------------|-----------------|-----------------|-----------------|-----------------|--------------------|--------------------|
|                                                                                                                              | ge     | aa <sub>N</sub> | ar <sub>N</sub> | ra <sub>N</sub> | rr <sub>N</sub> | aa <sub>T</sub> | ar <sub>T</sub> | ra <sub>T</sub> | rr <sub>T</sub> | gg <sub>IN</sub>   | gg <sub>IT</sub>   |
| 1                                                                                                                            | DKK1   | 192             | 360             | 24              | 0               | 0               | 216             | 360             | 0               | DKK1  -<> SFRP3    | DKK1 <>-  SFRP3    |
| 2                                                                                                                            | DKK2   | 360             | 168             | 0               | 48              | 216             | 217             | 0               | 143             | DKK2 <>-<> SFRP3   | DKK2  -<> SFRP3    |
| 3                                                                                                                            | DKK3-1 | 360             | 160             | 0               | 56              | 216             | 226             | 0               | 134             | DKK3-1 <>-<> SFRP3 | DKK3-1  -<> SFRP3  |
| 4                                                                                                                            | DKK3-2 | 240             | 336             | 0               | 0               | 336             | 240             | 0               | 0               | DKK3-2  -<> SFRP3  | DKK3-2 <>-<> SFRP3 |
| 5                                                                                                                            | DKK4   | 0               | 480             | 96              | 0               | 0               | 116             | 460             | 0               | DKK4  -<> SFRP3    | DKK4 <>-  SFRP3    |
| 6                                                                                                                            | DACT1  | 346             | 230             | 0               | 0               | 216             | 360             | 0               | 0               | DACT1 <>-<> SFRP3  | DACT1  -<> SFRP3   |
| 7                                                                                                                            | DACT2  | 312             | 264             | 0               | 0               | 264             | 312             | 0               | 0               | DACT2 <>-<> SFRP3  | DACT2  -<> SFRP3   |
| 8                                                                                                                            | DACT3  | 504             | 0               | 0               | 72              | 69              | 0               | 0               | 507             | DACT3 <>-<> SFRP3  | DACT3  -<> SFRP3   |
| 9                                                                                                                            | SFRP1  | 552             | 24              | 0               | 0               | 46              | 460             | 0               | 70              | SFRP1 <>-<> SFRP3  | SFRP1  -<> SFRP3   |
| 10                                                                                                                           | SFRP2  | 480             | 0               | 0               | 96              | 96              | 480             | 0               | 0               | SFRP2 <>-<> SFRP3  | SFRP2  -<> SFRP3   |
| 11                                                                                                                           | SFRP4  | 264             | 312             | 0               | 0               | 312             | 264             | 0               | 0               | SFRP4  -<> SFRP3   | SFRP4 <>-<> SFRP3  |
| 12                                                                                                                           | SFRP5  | 460             | 0               | 0               | 116             | 115             | 0               | 0               | 461             | SFRP5 <>-<> SFRP3  | SFRP5  -<> SFRP3   |
| 13                                                                                                                           | WIF1   | 0               | 408             | 168             | 0               | 0               | 178             | 398             | 0               | WIF1  -<> SFRP3    | WIF1 <>-  SFRP3    |
| 14                                                                                                                           | LEF1   | 0               | 480             | 96              | 0               | 0               | 92              | 484             | 0               | LEF1  -<> SFRP3    | LEF1 <>-  SFRP3    |
| 15                                                                                                                           | MYC    | 0               | 456             | 120             | 0               | 0               | 134             | 442             | 0               | MYC  -<> SFRP3     | MYC <>-  SFRP3     |
| 16                                                                                                                           | CCND1  | 0               | 480             | 96              | 0               | 0               | 96              | 480             | 0               | CCND1  -<> SFRP3   | CCND1 <>-  SFRP3   |
| 17                                                                                                                           | CD44   | 0               | 376             | 200             | 0               | 0               | 192             | 384             | 0               | CD44  -<> SFRP3    | CD44 <>-  SFRP3    |
| SFRP3 activation status apropos gene evidences in Normal and Tumor samples using $\theta = \theta_N$ and $\theta = \theta_T$ |        |                 |                 |                 |                 |                 |                 |                 |                 |                    |                    |
|                                                                                                                              | ge     | aa <sub>N</sub> | ar <sub>N</sub> | ra <sub>N</sub> | rr <sub>N</sub> | aa <sub>T</sub> | ar <sub>T</sub> | ra <sub>T</sub> | rr <sub>T</sub> | gg <sub>IN</sub>   | gg <sub>IT</sub>   |
| 1                                                                                                                            | DKK1   | 0               | 360             | 216             | 0               | 360             | 216             | 0               | 0               | DKK1  -<> SFRP3    | DKK1 <>-<> SFRP3   |
| 2                                                                                                                            | DKK2   | 360             | 0               | 0               | 216             | 216             | 360             | 0               | 0               | DKK2 <>-<> SFRP3   | DKK2  -<> SFRP3    |
| 3                                                                                                                            | DKK3-1 | 360             | 0               | 0               | 216             | 216             | 360             | 0               | 0               | DKK3-1 <>-<> SFRP3 | DKK3-1  -<> SFRP3  |
| 4                                                                                                                            | DKK3-2 | 0               | 328             | 240             | 8               | 336             | 240             | 0               | 0               | DKK3-2  -<> SFRP3  | DKK3-2 <>-<> SFRP3 |
| 5                                                                                                                            | DKK4   | 0               | 480             | 96              | 0               | 0               | 116             | 460             | 0               | DKK4  -<> SFRP3    | DKK4 <>-  SFRP3    |
| 6                                                                                                                            | DACT1  | 346             | 230             | 0               | 0               | 216             | 360             | 0               | 0               | DACT1 <>-<> SFRP3  | DACT1  -<> SFRP3   |
| 7                                                                                                                            | DACT2  | 24              | 0               | 288             | 264             | 264             | 312             | 0               | 0               | DACT2 <>-  SFRP3   | DACT2  -<> SFRP3   |
| 8                                                                                                                            | DACT3  | 504             | 0               | 0               | 72              | 69              | 0               | 0               | 507             | DACT3 <>-<> SFRP3  | DACT3  -<> SFRP3   |
| 9                                                                                                                            | SFRP1  | 552             | 0               | 0               | 24              | 46              | 530             | 0               | 0               | SFRP1 <>-<> SFRP3  | SFRP1  -<> SFRP3   |
| 10                                                                                                                           | SFRP2  | 480             | 0               | 0               | 96              | 96              | 480             | 0               | 0               | SFRP2 <>-<> SFRP3  | SFRP2  -<> SFRP3   |
| 11                                                                                                                           | SFRP4  | 0               | 77              | 264             | 235             | 312             | 264             | 0               | 0               | SFRP4 <>-  SFRP3   | SFRP4 <>-<> SFRP3  |
| 12                                                                                                                           | SFRP5  | 460             | 0               | 0               | 116             | 115             | 411             | 0               | 50              | SFRP5 <>-<> SFRP3  | SFRP5  -<> SFRP3   |
| 13                                                                                                                           | WIF1   | 0               | 408             | 168             | 0               | 398             | 178             | 0               | 0               | WIF1  -<> SFRP3    | WIF1 <>-<> SFRP3   |
| 14                                                                                                                           | LEF1   | 0               | 480             | 96              | 0               | 0               | 92              | 484             | 0               | LEF1  -<> SFRP3    | LEF1 <>-  SFRP3    |
| 15                                                                                                                           | MYC    | 0               | 456             | 120             | 0               | 0               | 134             | 442             | 0               | MYC  -<> SFRP3     | MYC <>-  SFRP3     |
| 16                                                                                                                           | CCND1  | 0               | 480             | 96              | 0               | 0               | 96              | 480             | 0               | CCND1  -<> SFRP3   | CCND1 <>-  SFRP3   |
| 17                                                                                                                           | CD44   | 0               | 376             | 200             | 0               | 384             | 192             | 0               | 0               | CD44  -<> SFRP3    | CD44 <>-<> SFRP3   |

Table 3: SFRP3 activation status in test samples conditional on status of individual gene activation (represented by evidence in test data) in Normal and Tumor samples. Measurements are taken over summation of all predicted values across the different runs of the 2-Hold out experiment. Here the notations denote the following: a - active, p - passive, N - Normal, T - Tumor, gg<sub>IN</sub> - gene-gene interaction with Normal, gg<sub>IT</sub> - gene-gene interaction with Tumor, <> - active and | - repressed.

573 interactions - the inferred interactions differ based on the choice of the threshold  
574 involved (which is a computational issue) but if prevalent, the underlying psy-  
575 chophysical laws remain unchanged (which is a natural phenomena irrespective  
576 of the components involved).

577 The network obtained by using an arbitrary value like 0.5 for labeling the  
578 gene interactions is different from those obtained using a weighted mean. There  
579 are advantages of choosing the weighted mean of the training labels for each  
580 gene - • Each gene has an individual threshold that is different from the other  
581 as the expression values are different and the discretization used to estimate  
582 a particular threshold is based on the median value of the training data for  
583 that particular gene under consideration. • The weighted mean assigns ap-  
584 propriate weights to the labels under consideration rather than assigning equal  
585 weights which might not represent the actual threshold. • Due to the properties  
586 mentioned in the second point, it might be expected that the weighted mean  
587 generates a sparse network in comparison to that generated using an arbitrary

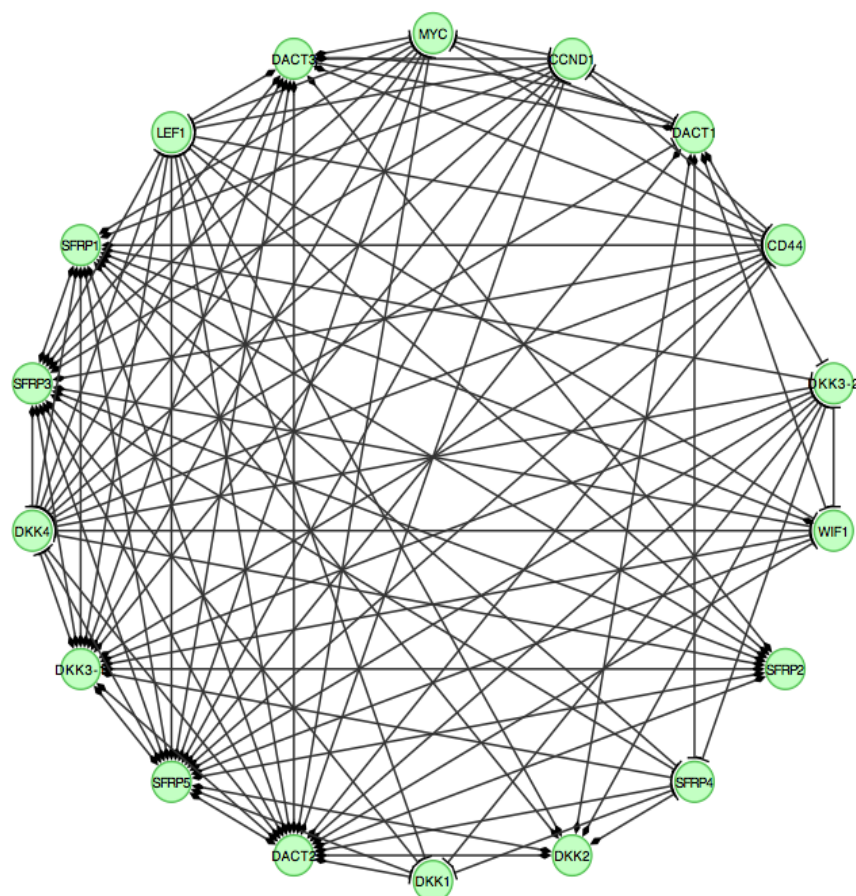

Figure 8: Gene gene interactions for normal case while using  $\mathcal{M}_{PBK+EI}$  with  $\theta = 0.5$ . Note that the effect of initialized cpt for *TRCMPLX* is 90% in tumorous case and 10% in normal case. Diamond <> means activation and straight bar | means repression.

588 value of 0.5. • Finally, the weighted mean could reveal interactions between two  
589 genes that might be happening at different stages of time. Even though using  
590 a static model, capturing such intricate interactions is possible as will be seen  
591 later.

592 There is a formulation for weighted means, but the computation of the  
593 weighted mean for training samples belonging to Normal and Tumor is done

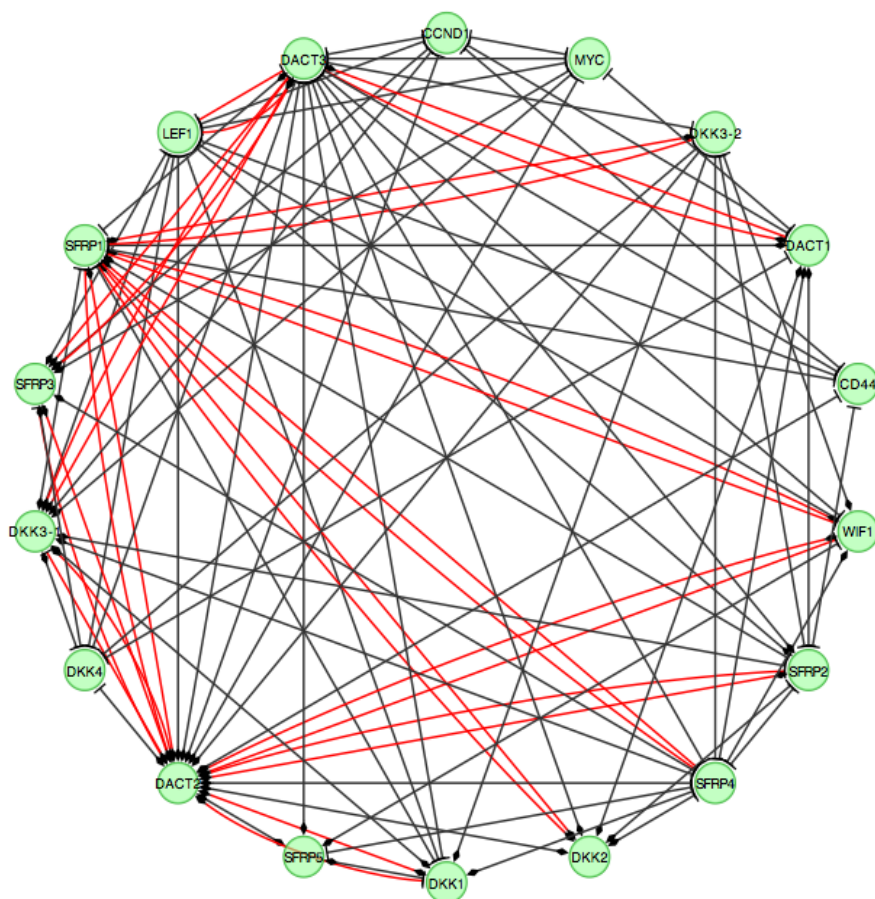

Figure 9: Gene gene interactions for normal case while using  $\mathcal{M}_{PBK+EI}$  with  $\theta = \theta_N$ . Note that the effect of initialized cpt for *TRCMPLX* is 90% in tumorous case and 10% in normal case. Diamond <> means activation and straight bar | means repression.

594 separately. The separate formulations are given below -

$$\begin{aligned}\theta_N &= \frac{1 \times n_{1,N} + 2 \times n_{2,N}}{(1 + 2) \times (n_{1,N} + n_{2,N})} \\ \theta_T &= \frac{1 \times n_{1,T} + 2 \times n_{2,T}}{(1 + 2) \times (n_{1,T} + n_{2,T})}\end{aligned}\tag{8}$$

595 were,  $n_{1,N}$  is the number of Normal training samples with label 1,  $n_{2,N}$  is the  
596 number of Normal training samples with label 2,  $n_{1,T}$  is the number of Tumor  
597 training samples with label 1 and  $n_{2,T}$  is the number of Tumor training samples  
598 with label 2. Note that the sample labels (i.e evidence of gene expression) were  
599 discretized to passive or 1 (active or 2).

---

Gene-gene interactions using  $\theta = 0.5$

---

DACT2 <> -| DKK1, SFRP4 |-| DKK1, DACT1 <> - <> DKK2, SFRP1  
 <> - <> DKK2, LEF1 |- <> DKK2, DKK4 |- <> DKK3-1, DACT3 <>  
 - <> DKK3-1, SFRP2 <> - <> DKK3-1, SFRP3 <> - <> DKK3-1,  
 SFRP5 <> - <> DKK3-1, WIF1 |- <> DKK3-1, LEF1 |- <> DKK3-  
 1, MYC |- <> DKK3-1, CCND1 |- <> DKK3-1, CD44 |- <> DKK3-1,  
 DKK1 |-| DKK3-2, DKK2 <> -| DKK3-2, DKK3-1 <> -| DKK3-2, DACT1  
 <> -| DKK3-2, DACT2 <> -| DKK3-2, SFRP1 <> -| DKK3-2, SFRP4 |-|  
 DKK3-2, DKK3-2 |-| DKK4, DACT3 <> -| DKK4, SFRP2 <> -| DKK4,  
 SFRP3 <> -| DKK4, SFRP5 <> -| DKK4, WIF1 |-| DKK4, LEF1 |-|  
 DKK4, MYC |-| DKK4, CCND1 |-| DKK4, CD44 |-| DKK4, DKK4 |-|  
 DACT1, DACT3 <> -| DACT1, MYC |-| DACT1, CCND1 |-| DACT1,  
 DKK2 <> - <> DACT2, DKK3-1 <> - <> DACT2, DKK4 |- <> DACT2,  
 DACT3 <> - <> DACT2, SFRP1 <> - <> DACT2, SFRP2 <> - <>  
 DACT2, SFRP3 <> - <> DACT2, SFRP4 |- <> DACT2, SFRP5 <> - <>  
 DACT2, WIF1 |- <> DACT2, LEF1 |- <> DACT2, MYC |- <> DACT2,  
 CCND1 |- <> DACT2, CD44 |- <> DACT2, DACT1 <> -| DACT3, DKK3-  
 1 <> - <> SFRP1, DKK4 |- <> SFRP1, SFRP2 <> - <> SFRP1, SFRP3  
 <> - <> SFRP1, SFRP4 |- <> SFRP1, SFRP5 <> - <> SFRP1, MYC  
 |- <> SFRP1, CCND1 |- <> SFRP1, CD44 |- <> SFRP1, DACT3 <>  
 - <> SFRP2, SFRP3 <> - <> SFRP2, LEF1 |- <> SFRP2, DKK1 |- <>  
 SFRP3, DACT3 <> - <> SFRP3, SFRP5 <> - <> SFRP3, WIF1 |- <>  
 SFRP3, LEF1 |- <> SFRP3, MYC |- <> SFRP3, CCND1 |- <> SFRP3,  
 CD44 |- <> SFRP3, DKK2 <> -| SFRP4, DKK3-1 <> -| SFRP4, DACT1  
 <> -| SFRP4, SFRP3 <> -| SFRP4, DKK1 |- <> SFRP5, DKK2 <> - <>  
 SFRP5, DKK3-2 |- <> SFRP5, DACT1 <> - <> SFRP5, DACT3 <> - <>  
 SFRP5, SFRP2 <> - <> SFRP5, WIF1 |- <> SFRP5, LEF1 |- <> SFRP5,  
 MYC |- <> SFRP5, CCND1 |- <> SFRP5, CD44 |- <> SFRP5, DKK3-2  
 |-| WIF1, DACT1 <> -| WIF1, SFRP1 <> - <> WIF1, DKK1 |-| LEF1,  
 DACT3 <> -| LEF1, WIF1 |-| LEF1, MYC |-| LEF1, CCND1 |-| LEF1,  
 CD44 |-| LEF1, DACT3 <> -| MYC, CCND1 |-| MYC, DACT3 <> -|  
 CCND1, DACT3 <> -| CD44, MYC |-| CD44, CCND1 |-| CD44

---

Table 4: Tabulated gene gene interactions of figure 8 using  $\mathcal{M}_{PBK+EI}$  obtained in case of Normal samples. Here, the symbols represent the following - <> activation and | repression/suppression. Note that for Tumor cases, the interaction roles were found to be reversed, ie. <> -| in normal became |- <> in tumor, |- <> in normal became <> -| in tumor, <> - <> in normal became |-| in tumor and |-| in normal became <> - <> in tumor.

600 Based on the steps described in Appendix, for each gene a matrix is obtained  
 601 that shows the statistics of how the status of a gene is affected conditional on  
 602 the individual evidences of the remaining genes. Also, for each of the  $i^{th}$  gene  
 603 the averaged  $\widehat{Pr}_N(g_i|g_k)$  is also stored in vector  $PggN$ . Same is done for tumor  
 604 cases. These two vectors are later used to test the veracity of existence of  
 605 psychophysical laws in gene-gene interaction network. Table 3 represents one  
 606 such tabulation for gene *SFRP3*. For all runs and all test samples, the following  
 607 was tabulated in table 3 :  $aa_N - SFRP3$  is active (a) when a gene is active (a)



---

Gene interaction using  $\theta = \theta_N$

---

DKK3-1 | - | DKK1, DKK3-2 <> -| DKK1, DACT2 | - | DKK1, SFRP4  
 <> -| DKK1, DACT1 | - | DKK2, SFRP1 | - | DKK2, DKK4 <> -| DKK3-  
 1, DACT2 | - <> DKK3-1, DACT3 | - | DKK3-1, LEF1 <> -| DKK3-1,  
 MYC <> -| DKK3-1, CCND1 <> -| DKK3-1, SFRP1 | - | DKK3-2, DKK3-2  
 <> - <> DKK4, DKK4 <> - <> DACT1, DACT3 | - <> DACT1, MYC  
 <> - <> DACT1, CCND1 <> - <> DACT1, DKK1 <> -| DACT2, DKK2  
 | - | DACT2, DKK3-1 | - | DACT2, DKK3-2 <> -| DACT2, DKK4 <> -|  
 DACT2, SFRP1 | - | DACT2, SFRP2 | - | DACT2, SFRP3 | - | DACT2,  
 SFRP4 <> -| DACT2, SFRP5 | - | DACT2, WIF1 <> -| DACT2, LEF1  
 <> -| DACT2, MYC <> -| DACT2, CCND1 <> -| DACT2, CD44 <> -|  
 DACT2, DKK1 <> - <> DACT3, DKK2 | - <> DACT3, DKK3-1 | - <>  
 DACT3, DKK3-2 <> - <> DACT3, DKK4 <> - <> DACT3, DACT1  
 | - <> DACT3, DACT2 | - <> DACT3, SFRP2 | - <> DACT3, SFRP3 | - <>  
 DACT3, SFRP4 <> - <> DACT3, SFRP5 | - <> DACT3, WIF1 <> - <>  
 DACT3, LEF1 <> - <> DACT3, MYC <> - <> DACT3, CCND1 <>  
 - <> DACT3, CD44 <> - <> DACT3, DKK1 <> - <> SFRP1, DKK2  
 | - <> SFRP1, DKK3-1 | - <> SFRP1, DKK3-2 <> - <> SFRP1, DACT1  
 | - <> SFRP1, DACT2 | - <> SFRP1, DACT3 | - <> SFRP1, SFRP4 <>  
 - <> SFRP1, WIF1 <> - <> SFRP1, CD44 <> - <> SFRP1, DKK2  
 | - <> SFRP2, DKK3-1 | - <> SFRP2, DKK3-2 <> - <> SFRP2, DACT1  
 | - <> SFRP2, DACT2 | - <> SFRP2, SFRP1 | - <> SFRP2, SFRP4 <>  
 - <> SFRP2, LEF1 <> -| SFRP2, CD44 <> - <> SFRP2, DKK4 <> -|  
 SFRP3, DACT2 | - <> SFRP3, DACT3 | - | SFRP3, LEF1 <> -| SFRP3,  
 MYC <> -| SFRP3, CCND1 <> -| SFRP3, DKK2 | - <> SFRP4, DKK3-1  
 | - <> SFRP4, DKK3-2 <> - <> SFRP4, DACT1 | - <> SFRP4, SFRP1  
 | - <> SFRP4, SFRP3 | - <> SFRP4, DKK1 <> -| SFRP5, SFRP4 <> - <>  
 SFRP5, DKK3-2 <> -| WIF1, DACT2 | - | WIF1, SFRP1 | - | WIF1, SFRP4  
 <> -| WIF1, SFRP5 | - <> WIF1, DKK1 <> - <> LEF1, DKK4 <> - <>  
 LEF1, DACT3 | - <> LEF1, WIF1 <> - <> LEF1, CCND1 <> - <> LEF1,  
 CD44 <> - <> LEF1, LEF1 <> - <> MYC, MYC <> - <> CCND1,  
 CCND1 <> - <> CD44

---

Table 5: Tabulated gene gene interactions of figure 9 using  $\mathcal{M}_{PBK+EI}$  obtained in case of Normal samples. Here, the symbols represent the following - <> activation and | repression/suppression. Note that for Tumor cases, the interaction roles were found to be reversed, ie. <> -| in normal became | - <> in tumor, | - <> in normal became <> -| in tumor, <> - <> in normal became | - | in tumor and | - | in normal became <> - <> in tumor.

608 in Normal (N) sample,  $ar_N - SFRP3$  is active (a) when a gene is repressed (r)  
 609 in Normal (N) sample,  $ra_N - SFRP3$  is repressed (r) when a gene is active (a)  
 610 in Normal (N) sample,  $rr_N - SFRP3$  is repressed (r) when a gene is repressed  
 611 (r) in Normal (N) sample,  $aa_T - SFRP3$  is active (a) when a gene is active (a)  
 612 in Tumor (T) sample,  $ar_T - SFRP3$  is active (a) when a gene is repressed (r)  
 613 in Tumor (T) sample,  $pa_T - SFRP3$  is repressed (r) when a gene is active (a)  
 614 in Tumor (T) sample,  $gg_{IN}$  - interaction of  $SFRP3$  given the gene evidence  
 615 based on majority voting among  $aa_N$ ,  $ar_N$ ,  $ra_N$  and  $rr_N$  and finally,  $gg_{IT}$  -

| Missing gene-gene interactions for different values of ETGN using $\theta = 0.5$      |               |                                                                                                                                                                                                                                                                                                                                                                                                                                                                                                                                                                                                                                                               |
|---------------------------------------------------------------------------------------|---------------|---------------------------------------------------------------------------------------------------------------------------------------------------------------------------------------------------------------------------------------------------------------------------------------------------------------------------------------------------------------------------------------------------------------------------------------------------------------------------------------------------------------------------------------------------------------------------------------------------------------------------------------------------------------|
| <b>90N-T1</b>                                                                         | <b>80N-T1</b> | (in <b>90N-T1</b> ) MYC   -   DACT1, CCND1   -   DACT1, SFRP2 <> - <> SFRP5, CCND1   -   MYC, DACT3 <> -   CCND1, MYC   -   CD44 (in <b>80N-T1</b> ) SFRP5 <> - <> SFRP2, MYC   -   CCND1                                                                                                                                                                                                                                                                                                                                                                                                                                                                     |
|                                                                                       | <b>70N-T1</b> | (in <b>90N-T1</b> ) DACT3 <> -   DACT1, MYC   -   DACT1, CCND1   -   DACT1, SFRP2 <> - <> SFRP5, CCND1   -   MYC, DACT3 <> -   CCND1, DACT3 <> -   CD44, MYC   -   CD44 (in <b>70N-T1</b> ) SFRP5 <> - <> SFRP2, MYC   -   CCND1                                                                                                                                                                                                                                                                                                                                                                                                                              |
|                                                                                       | <b>60N-T1</b> | (in <b>90N-T1</b> ) DACT3 <> -   DACT1, MYC   -   DACT1, CCND1   -   DACT1, SFRP2 <> - <> SFRP5, CCND1   -   MYC, DACT3 <> -   CCND1, DACT3 <> -   CD44, MYC   -   CD44 (in <b>60N-T1</b> ) SFRP5 <> - <> SFRP2, MYC   -   CCND1                                                                                                                                                                                                                                                                                                                                                                                                                              |
|                                                                                       | <b>50N-T1</b> | (in <b>90N-T1</b> ) CD44   - <> DKK3-1, SFRP1 <> -   DKK3-2, CD44   -   DKK4, DACT3 <> -   DACT1, MYC   -   DACT1, CCND1   -   DACT1, DKK3-1 <> - <> SFRP1, DKK4   - <> SFRP1, SFRP2 <> - <> SFRP5, DACT1 <> -   WIF1, CCND1   -   MYC, DACT3 <> -   CCND1, DACT3 <> -   CD44, MYC   -   CD44 (in <b>50N-T1</b> ) SFRP1 <> - <> DKK3-1, CD44   -   DKK3-2, SFRP1 <> -   DKK4, DKK3-2   - <> SFRP1, SFRP5 <> - <> SFRP2, MYC   - <> SFRP2, CCND1   - <> SFRP2, CD44   -   SFRP4, MYC   -   CCND1                                                                                                                                                               |
| Missing gene-gene interactions for different values of ETGN using $\theta = \theta_N$ |               |                                                                                                                                                                                                                                                                                                                                                                                                                                                                                                                                                                                                                                                               |
| <b>90N-T1</b>                                                                         | <b>80N-T1</b> | (in <b>90N-T1</b> ) MYC   - <> DKK3-1, SFRP1 <> - <> DKK3-2, MYC   -   DACT1 (in <b>80N-T1</b> ) MYC   -   SFRP5                                                                                                                                                                                                                                                                                                                                                                                                                                                                                                                                              |
|                                                                                       | <b>70N-T1</b> | (in <b>90N-T1</b> ) DKK4   - <> DKK3-1, MYC   - <> DKK3-1, SFRP1 <> - <> DKK3-2, MYC   -   DACT1, CCND1   -   DACT1, SFRP1 <> -   SFRP2, SFRP1 <> -   SFRP4, CD44   -   LEF1 (in <b>70N-T1</b> ) DKK4   -   SFRP5, MYC   -   SFRP5, CCND1   -   SFRP5, DKK2 <> - <> WIF1, DKK3-1 <> - <> WIF1                                                                                                                                                                                                                                                                                                                                                                 |
|                                                                                       | <b>60N-T1</b> | (in <b>90N-T1</b> ) DKK4   - <> DKK3-1, MYC   - <> DKK3-1, CCND1   - <> DKK3-1, SFRP1 <> - <> DKK3-2, DACT3 <> -   DACT1, MYC   -   DACT1, CCND1   -   DACT1, DACT3 <> -   SFRP1, SFRP1 <> -   SFRP2 MYC   - <> SFRP3, SFRP1 <> -   SFRP4, CD44   -   LEF1 (in <b>60N-T1</b> ) MYC   -   SFRP1, MYC   -   SFRP2, DKK4   -   SFRP5, MYC   -   SFRP5, CCND1   -   SFRP5, DKK2 <> - <> WIF1, DKK3-1 <> - <> WIF1, CD44   - <> WIF1                                                                                                                                                                                                                               |
|                                                                                       | <b>50N-T1</b> | (in <b>90N-T1</b> ) DKK4   - <> DKK3-1, MYC   - <> DKK3-1, CCND1   - <> DKK3-1, SFRP1 <> - <> DKK3-2, DACT3 <> -   DACT1, MYC   -   DACT1, CCND1   -   DACT1, DACT3 <> -   SFRP1, SFRP1 <> -   SFRP2, MYC   - <> SFRP3, SFRP1 <> -   SFRP4, DKK4   -   LEF1, CCND1   -   LEF1, CD44   -   LEF1 (in <b>50N-T1</b> ) DKK4   - <> DKK1, MYC   - <> DKK1, CCND1   - <> DKK1, CD44   - <> DKK1, CD44   - <> DKK3-2, MYC   -   SFRP1, DKK4   -   SFRP2, DACT3 <> - <> SFRP2, MYC   -   SFRP2, CCND1   -   SFRP2, MYC   -   SFRP5, CCND1   -   SFRP5, DKK2 <> - <> WIF1, DKK3-1 <> - <> WIF1, DKK4   - <> WIF1, MYC   - <> WIF1, CCND1   - <> WIF1, CD44   - <> WIF1 |

Table 6: Tabulated missing gene gene interactions of figure 8 and 9 using  $\mathcal{M}_{PBK+EI}$  obtained in case of Normal samples. Interactions found in Normal samples with 80%, 70%, 60% and 50% effect that are not found with 90% and vice versa have been recorded. Here, the symbols represent the following - <> activation and | repression/suppression. Note that for Tumor cases, the interaction roles were found to be reversed, ie. <> - | in normal became | - <> in tumor, | - <> in normal became <> - | in tumor, <> - <> in normal became | - | in tumor and | - | in normal became <> - <> in tumor.

616 interaction of *SFRP3* given the gene evidence based on majority voting among  
617  $aa_T$ ,  $ar_T$ ,  $ra_T$  and  $rr_T$ . The highest score among  $aa_N$ ,  $ar_N$ ,  $ra_N$  and  $rr_N$   
618 ( $aa_T$ ,  $ar_T$ ,  $ra_T$  and  $rr_T$ ) confirms the relation between genes using Normal  
619 (Tumor) samples. Activation (repression) for *SFRP3* is based on discretizing  
620 the predicted conditional probability  $\Pr(SFRP3 = \text{active}|g_j \text{ evidence})$  as  $\geq \theta$   
621 ( $< \theta$ ). Activation (repression) for a particular gene evidence  $g_j$  is done using  
622 discrete evidence. In table 3, under the columns  $gg_{IN}$  and  $gg_{IT}$ ,  $<>$  implies  
623 the gene is active and  $|$  implies the gene is repressed or passive.

#### 624 **Gene-gene interaction network when $\theta = 0.5$**

625 Considering only reversible interactions, in table 3 it was found that evidence  
626 for *DKK1* and *DKK4* show similar repression behaviour as the standard genes  
627 *WIF1*, *LEF1*, *MYC*, *CCND1* and *CD44* in Normal (Tumor) test samples.  
628 Only, *SFRP5* and *DACT3* in Normal (Tumor) test samples shows activation  
629 (repression). Conditional on the observed activation status of the genes men-  
630 tioned above, *SFRP3* shows activated (repressed) state in Normal (Tumor)  
631 test samples. *SFRP3* showed behaviour similar to *SFRP* –  $1/2/5$ . Since it is  
632 known that the activation status of the latter is influenced by epigenetic factors,  
633 *SFRP3* might also be influenced by epigenetic factors.

634 Irreversible interactions present in table 3 are deleted as they do not provide  
635 concrete information regarding the functional roles of the genes in normal and  
636 tumor cases. This attributes to one of the following facts (1) noise that corrupts  
637 prediction values as can be seen in the columns of  $aa_N$  ( $aa_T$ ),  $ar_N$  ( $ar_T$ ),  $ra_N$   
638 ( $ra_T$ ) and  $rr_N$  ( $rr_T$ ) or (2) other multiple genes might be interacting along with  
639 *SFRP3* in a combined manner and it is not possible to decipher the relation  
640 between *SFRP3* and other genes. This calls for investigation of prediction of  
641 *SFRP3* status conditional on joint evidences of two or more genes (a combina-  
642 torial problem with a search space order of  $2^{17} - 17$ , which excludes 17 cases of  
643 individual gene evidences which have already been considered here). Incorpor-  
644 ating multiple gene evidences is not a problem while using Bayesian network  
645 models as they are designed to compute conditional probabilities given joint  
646 evidences also (except at the cost of high computational time).

647 It is evident that an arbitrary value of  $\theta = 0.5$  will not generate appropriate  
648 networks. This is due to the fact that 0.5 does not encode the biological knowl-  
649 edge of thresholding while using discretization. To over come this, a weighted  
650 mean is employed as shown below.

#### 651 **Gene-gene interaction network when $\theta = \theta_N^{SFRP3}$**

652 While employing the weighted mean as the threshold to discretize  $\Pr(SFRP3$   
653  $= \text{active}|g_j \text{ evidence})$ , the *SFRP3* gene evidences that constitutes the test data  
654 are used. See step 5.a.iii in Appendix. Note that the test evidences for *SFRP3*  
655 are used for two purpose (1) to discretize  $\Pr(SFRP3 = \text{active}|g_j \text{ evidence})$   
656 as discussed above and (2) to compute the probability of activation status of  
657 another gene conditional on evidence for *SFRP3*, i.e  $\Pr(g_j = \text{active}|SFRP3$   
658  $\text{evidence})$ . Why to use test evidence or labels to compute weighted mean?  
659 Since the test evidence for a gene (i.e the discretized label) has been derived  
660 using the median computed on the corresponding training data for the same  
661 gene, it absolutely fine to use the discretized test labels to further compute the

662 weighted mean. This is because the median of gene expression is a value which  
663 is much higher than the probability value of 1 and cannot be used to discretize a  
664 predicted conditional probability value. Also, estimating the density estimates  
665 from a small population of gene expression values has its own weakness. To  
666 converge on a plausible realistic value the discretized test samples can be used  
667 to estimate a weighted mean which represents the summary of the distribution  
668 of the discretized values. This weighted mean of *SFRP3* test samples then  
669 discretizes  $\Pr(SFRP3 = \text{active}|g_j \text{ evidence})$  according to the inherently represented  
670 summary. More realistic estimates like kernel density estimates could  
671 also be used.

672 In comparison to the interactions derived using  $\theta = 0.5$  in table 3, it was  
673 found that a more restricted list of *DKK4*, *DACT - 2/3*, *LEF1*, *MYC* and  
674 *CCND1* showed reversible behaviour with *SFRP3* using the weighted mean.  
675 This reduction in the reversible interactions is due to the fact that the weighted  
676 mean carries an idiosyncrasy of the test label data distribution and is more  
677 restricted in comparison to the use of 0.5 value that was arbitrarily chosen.  
678 Finally, using the proposed weighted mean reveals more than one interaction  
679 between two genes. These interactions point to important hidden biological  
680 phenomena that require further investigation in the form of wet lab experiments  
681 and the ensuing in silico analysis. It also points to the fact that a particular  
682 gene may be showing different behaviour at different times in the network while  
683 interacting with multiple genes. An example of this will be addressed later.  
684 Again, dynamic models will bring more clarity to the picture. Table 3 shows  
685 these interactions using  $\theta \in \{0.5, \theta_N, \theta_T\}$ .

## 686 5.2. Inferring gene-gene interaction network

687 Next, after the construction of gene-gene interactions, it is necessary to infer  
688 the network. The inference of the estimated gene-gene interactions network is  
689 based on explicitly reversible roles in Normal and Tumor test samples. This  
690 means that only those interactions are selected which show the following prop-  
691 erty -  $g_j \langle \rangle - \langle \rangle g_i$  in Normal if and only if  $g_j| - |g_i$  in Tumor,  $g_j \langle \rangle - |g_i$   
692 in Normal if and only if  $g_j| - \langle \rangle g_i$  in Tumor,  $g_j| - \langle \rangle g_i$  in Normal if and  
693 only if  $g_j \langle \rangle - |g_i$  in Tumor and finally,  $g_j| - |g_i$  in Normal if and only if  
694  $g_j \langle \rangle - \langle \rangle g_i$ . This restricts the network to only reversible gene-gene inter-  
695 actions in Normal and Tumor cases. Note that an interaction  $g_j \mathcal{I} \mathcal{R} g_i (g_i \mathcal{I} \mathcal{R} g_j)$   
696 is depicted by  $\Pr(g_i|g_j) (\Pr(g_j|g_i))$ .

697 Reversibility helps in tracking the behaviour of gene-gene interaction in both  
698 normal and tumor case simultaneously and thus give more weight to confirma-  
699 tory results. Irreversible reactions here mean that the state of activation of a  
700 gene in both normal and tumor sample remains invariant given the evidence  
701 of the other gene in the gene-gene interaction. This helps in eliminating the  
702 interactions that might not be happening at all from biological perspective. To  
703 confirm the computational results wet lab experiments are needed. See table 3  
704 for reversible and irreversible interactions.

705 Next, duplicate interactions are removed from the network for normal sam-  
706 ples. This is repeated for the network based on tumor samples also. This is

Deviation study for *SFRP3* and *MYC* for normal case

| $\beta$ | $\Delta\beta$ | $\frac{\Delta\beta}{\beta}$ | $\log(1 + \frac{\Delta\beta}{\beta})$ | $\Delta\gamma$<br>$\Pr(SFRP3 MYC)$ | $\Delta\gamma$<br>$\Pr(MYC SFRP3)$ |
|---------|---------------|-----------------------------|---------------------------------------|------------------------------------|------------------------------------|
| 0.8     | 0.1           | 0.125                       | 0.117783                              | 0.003014287                        | 0.00324456                         |
| 0.7     | 0.1           | 0.1428571                   | 0.1335314                             | 0.002766111                        | 0.00324456                         |
| 0.6     | 0.1           | 0.1666667                   | 0.1541507                             | 0.002504868                        | 0.00324456                         |
| 0.5     | 0.1           | 0.2                         | 0.1823216                             | 0.002228110                        | 0.00324456                         |
| 0.8     | 0.1           | 0.125                       | 0.117783                              | 0.010513376                        | 0.01297824                         |
| 0.7     | 0.2           | 0.2857143                   | 0.2513144                             | 0.007499089                        | 0.00973368                         |
| 0.6     | 0.3           | 0.5                         | 0.4054651                             | 0.004732978                        | 0.00648912                         |
| 0.5     | 0.4           | 0.8                         | 0.5877867                             | 0.002228110                        | 0.00324456                         |

Table 7: Deviation study for  $\Pr(SFRP3|MYC)$  and  $\Pr(MYC|SFRP3)$  for normal case

707 achieved by removing one of the interactions from the following pairs ( $g_j \langle \rangle$   
708  $- \langle \rangle g_i$  and  $g_i \langle \rangle - \langle \rangle g_j$ ), ( $g_j \langle \rangle - |g_i$  and  $g_i | - \langle \rangle g_j$ ), ( $g_j | - \langle \rangle g_i$   
709 and  $g_i \langle \rangle - |g_j$ ) and ( $g_j | - |g_i$  and  $g_i | - |g_j$ ). This process is done to remove  
710 redundant interactions that are recorded via steps mentioned in construction of  
711 gene-gene interaction network. Figure 8 shows one such network after complete  
712 network construction, interaction labeling, consideration of reversible interactions  
713 and removal of duplicate interactions using Normal test samples with  
714 ETGN of 90% in  $\mathcal{M}_{PBK+EI}$ . For the case of Tumor test samples with ETGN  
715 90% in  $\mathcal{M}_{PBK+EI}$ , only the reversal of interactions need to be done. Table  
716 4 and 5 represents these interactions in figures 8 and 9 in a tabulated form,  
717 respectively.

718 Finally, different networks were generated by varying the effect of *TRCMPLX*  
719 (ETGN) and compared for the normal test samples. Table 6 represents the dif-  
720 ferent interactions that were preserved in network from ETGN 90% with respect  
721 to networks obtained from ETGN with values of 80%, 70%, 60% and 50%. It  
722 was found that most of the genetic interactions depicted in figures 8 and 9  
723 were found to be preserved across the different variations in ETGN as shown  
724 in table 6. Out of the total  $n$  genes which construct a fully connected graph of  
725  $\frac{n \times (n-1)}{2}$ , it was observed that lesser number of interconnections were preserved.  
726 This preservation indicates towards the robustness of the genetic contributions  
727 in the Wnt signaling pathway in both normal and tumor test samples. Note  
728 that these observations are made from static models and dynamic models might  
729 reveal greater information.

## 730 6. Results and discussion on observations 2 & 3

### 731 6.1. Logarithmic-power deviations in prediction of gene-gene interactions

732 In the previous section, it was found that some of the interactions remain  
733 preserved as there was change in the affect of transcription complex. The first

Deviation study for *SFRP3* and *MYC* for tumor case

| $\beta$ | $\Delta\beta$ | $\frac{\Delta\beta}{\beta}$ | $\log(1 + \frac{\Delta\beta}{\beta})$ | $\Delta\gamma$<br>$\Pr(SFRP5 MYC)$ | $\Delta\gamma$<br>$\Pr(MYC SFRP5)$ |
|---------|---------------|-----------------------------|---------------------------------------|------------------------------------|------------------------------------|
| 0.8     | 0.1           | 0.125                       | 0.117783                              | -0.006463410                       | 0.000000e+00                       |
| 0.7     | 0.1           | 0.1428571                   | 0.1335314                             | -0.006967724                       | 5.551115e-17                       |
| 0.6     | 0.1           | 0.1666667                   | 0.1541507                             | -0.007515486                       | -5.551115e-17                      |
| 0.5     | 0.1           | 0.2                         | 0.1823216                             | -0.008112496                       | 0.000000e+00                       |
| 0.8     | 0.1           | 0.125                       | 0.117783                              | -0.029059115                       | 0.000000e+00                       |
| 0.7     | 0.2           | 0.2857143                   | 0.2513144                             | -0.022595705                       | 0.000000e+00                       |
| 0.6     | 0.3           | 0.5                         | 0.4054651                             | -0.015627982                       | -5.551115e-17                      |
| 0.5     | 0.4           | 0.8                         | 0.5877867                             | -0.008112496                       | 0.000000e+00                       |

Table 8: Deviation study for  $\Pr(SFRP3|MYC)$  and  $\Pr(MYC|SFRP3)$  for tumor case

734 observation of this work was that deviations in the activity of the transcription  
735 complex followed a logarithmic-power psychophysical law. The manifestation  
736 of these laws at transcriptional levels can be attributed to the fold changes in  
737  $\beta$ -catenin levels and the prevalence of Weber’s law observed by Goentoro and  
738 Kirschner (2009). In this perspective, it would be interesting to observe if these  
739 laws are prevalent among the gene-gene interactions in the network or not.

740 **Case:**  $\langle \rangle - |$  or  $| - \langle \rangle$  with  $\theta = \theta_N$

741 In Sinha (2014), the unknown behaviour of *SFRP3* in the Wnt pathway  
742 has been revealed slightly using computational causal inference. In figure 8,  
743 *SFRP3* shows preservation in the network and its interaction with other ge-  
744 netic factors involved in the model proposed in Sinha (2014) has been depicted.  
745 In one such paired interaction between *SFRP3* and *MYC*, *SFRP3* showed  
746 activation (repression) and *MYC* showed repression (activation) in normal (tu-  
747 mor) samples. As the change in the effect of transcription complex was induced  
748 by changing the initially assigned cpt values for *TRCMPLX* node, the devi-  
749 ations in the prediction of the gene-gene interaction network was observed to  
750 follow the logarithmic-power law crudely. What this means is that deviations  
751 or fold changes might also be prevalent at the gene-gene interaction level due  
752 to the upstream fold changes in  $\beta$ -catenin that induces transcriptional activity.  
753 More specifically, the deviation in the joint interaction that is represented by  
754 the degree of belief via the conditional probability of status of one gene given  
755 the evidence or activation status regarding another gene i.e  $\Pr(g_i|g_j)$ , is influ-  
756 enced by the fold changes upstream of the pathway and thus exhibit similar  
757 psychophysical laws.

758 Table 7 and 8 show these deviations in the prediction of the interactions  
759 for both the normal and the tumor cases. The tables show how deviations are  
760 affected when the changes in the effect of the transcription complex are done at  
761 constant and incremental rate. To summarize the results in these tables, graphs

762 were plotted in figures 10 for  $\Pr(SFRP3|MYC)$  (constant deviations), 11 for  
763  $\Pr(MYC|SFRP3)$  (constant deviations), 12 for  $\Pr(SFRP3|MYC)$  (incremental  
764 deviations) and 11 for  $\Pr(MYC|SFRP3)$  (incremental deviations).

765 Considering figure 10, when deviations are constant in both Weber and  
766 Bernoulli formulation, the deviations in the prediction of  $\Pr(SFRP3|MYC)$   
767 is observed to be logarithmic in the normal samples (apropos the Weber and  
768 Bernoulli deviations represented by green and cyan curves). Deviation in pre-  
769 dictions are depicted by the red (blue) curves for normal (tumor) samples. Such  
770 a behaviour is not observed for  $\Pr(MYC|SFRP3)$  as is depicted in figure 11.  
771 Note that the interaction for  $SFRP3$  given  $MYC$  was observed to be reversible  
772 in normal and tumor cases. But this is not so with the interaction for  $MYC$   
773 given  $SFRP3$ . It might be expected that the non conformance of logarithmic-  
774 power law for  $\Pr(MYC|SFRP3)$  may be due to the non preservation/existence  
775 of the interaction of  $MYC$  given  $SFRP3$ . This is so because  $\Pr(SFRP3|MYC)$   
776 depicts a reversible  $SFRP3 \leftrightarrow -|MYC$  ( $MYC \leftrightarrow -|SFRP3$ ) in the net-  
777 work on normal (tumor) samples, while  $\Pr(MYC|SFRP3)$  does not depict a  
778 reversible  $MYC|- \leftrightarrow SFRP3$  ( $MYC|- |SFRP3$ ) in the network on normal  
779 (tumor) samples.

780 Similar behaviour was observed in the case of incremental deviations as de-  
781 picted in figures 12 and 13. Analysis of the behaviour of other gene-gene interac-  
782 tions showing  $\leftrightarrow -|$  or  $|- \leftrightarrow$  can be observed in a similar way and can be pro-  
783 duced by executing the R code in `Weber_Fechner_law.r` provided in Google drive  
784 [https://drive.google.com/folderview?id=0B7Kkv8wlhPU-T05wTTNodWNyYdjA&usp=](https://drive.google.com/folderview?id=0B7Kkv8wlhPU-T05wTTNodWNyYdjA&usp=sharing)  
785 **sharing**. Note that plots need manual axis and title adjustments. Some of the  
786 plot results has been compressed in the zip file titled `Results-2015.zip`.

787 **Case:**  $|-|$  or  $\leftrightarrow - \leftrightarrow$  with  $\theta = \theta_N$

788 Again, as pointed out in Sinha (2014), the unknown behaviour of  $SFRP2$   
789 in the Wnt pathway has been captured using computational causal inference.  
790 In figure 9,  $SFRP2$  shows preservation in the network and it's interaction with  
791 other genetic factors involved in the model proposed in Sinha (2014) has been  
792 depicted. In one such paired interaction between  $SFRP2$  and  $CD44$ , both  
793 showed repression (activation) in normal (tumor) samples. As the change in the  
794 effect of transcription complex was induced via sensitizing the initially assigned  
795 cpt values, the deviations in the prediction of the gene-gene interaction network  
796 was observed to follow the logarithmic-power law crudely.

797 Table 9 and 10 show these deviations in the prediction of the interactions  
798 for both the normal and the tumor cases. The tables show how deviations are  
799 affected when the changes in the effect of the transcription complex are done  
800 at constant and incremental level. To summarize the results in these tables,  
801 graphs were plotted in figures 14 for  $\Pr(SFRP2|CD44)$  (constant deviations),  
802 15 for  $\Pr(CD44|SFRP2)$  (constant deviations), 16 for  $\Pr(SFRP2|CD44)$  (in-  
803 cremental deviations) and 15 for  $\Pr(CD44|SFRP2)$  (incremental deviations).

804 Considering figure 14, when deviations are constant in both Weber and  
805 Bernoulli formulation, the deviations in the prediction of  $\Pr(SFRP2|CD44)$   
806 is observed to be logarithmic in the normal samples (apropos the Weber and  
807 Bernoulli deviations represented by green and cyan curves). Deviation in pre-

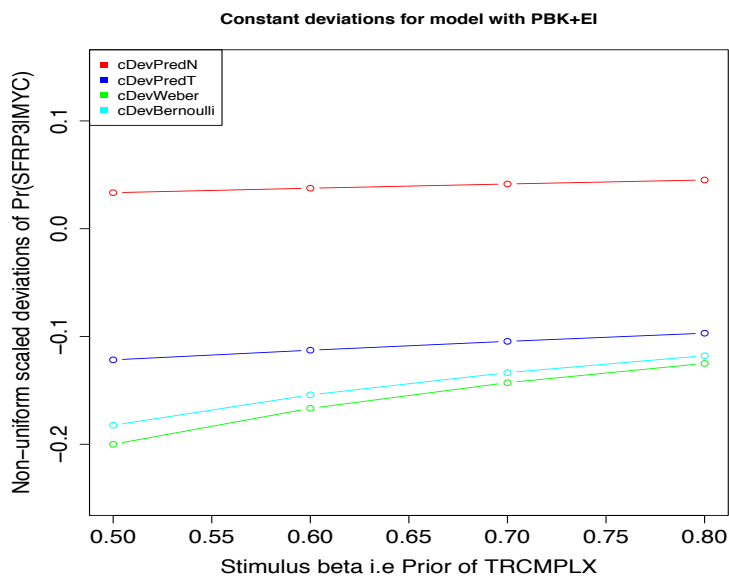

Figure 10: Constant deviations in  $\beta$  i.e ETGN and corresponding deviations in  $\Pr(SFRP3|MYC)$  for both normal and tumor test samples. Corresponding Weber and Bernoulli deviations were also recorded. Note that the plots and the y-axis depict scaled deviations to visually analyse the observations. The model used is  $\mathcal{M}_{PBK+EI}$ . Red - deviation in  $\Pr(SFRP3|MYC)$  in Normal case using Weber's law, Blue - deviation in  $\Pr(SFRP3|MYC)$  in Tumor using Weber's law, Green - constant deviation in Webers law, Cyan - constant deviation in Bernoullis law.

808 dictions are depicted by the red (blue) curves for normal (tumor) samples.  
 809 Such a behaviour is not observed for  $\Pr(CD44|SFRP2)$  as is depicted in figure  
 810 15. Even though  $\Pr(CD44|SFRP2)$  was computationally estimated through a  
 811 model, the interaction for  $CD44$  given  $SFRP2$  was not observed in both normal  
 812 and tumor cases while the interaction for  $SFRP2$  given  $CD44$  was observed to  
 813 be reversible. This points to a crucial fact that the interactions interpreted from  
 814 conditional probabilities are not always two sided. Thus the interpretation for  
 815  $\Pr(g_i|g_j)$  is investigated in both directions as  $g_i \mathcal{I} \mathcal{R} g_j$  and  $g_j \mathcal{I} \mathcal{R} g_i$  to get a full  
 816 picture. Not that the results are wrong, but all angles of interpretations need  
 817 to be investigated to get the picture between any two genes. Similar behaviour  
 818 was observed in the case of incremental deviations as depicted in figures 16 and  
 819 17. Note that graph for incremental deviation in  $\Pr(CD44|SFRP2)$  is just a  
 820 cumulative effect and does not state anything about the logarithmic law.

821 Finally, note that the predicted conditional probability a gene  $i$  given ev-  
 822 idence for gene  $j$  does not change but the inferred gene-gene interactions do  
 823 change depending on the choice of the threshold. These changes are depicted  
 824 in the figures 8 (table 4) and 9 (table 5). Dual interactions were inferred using  
 825 the weighted mean as a discretization factor, as is shown next. These are dual



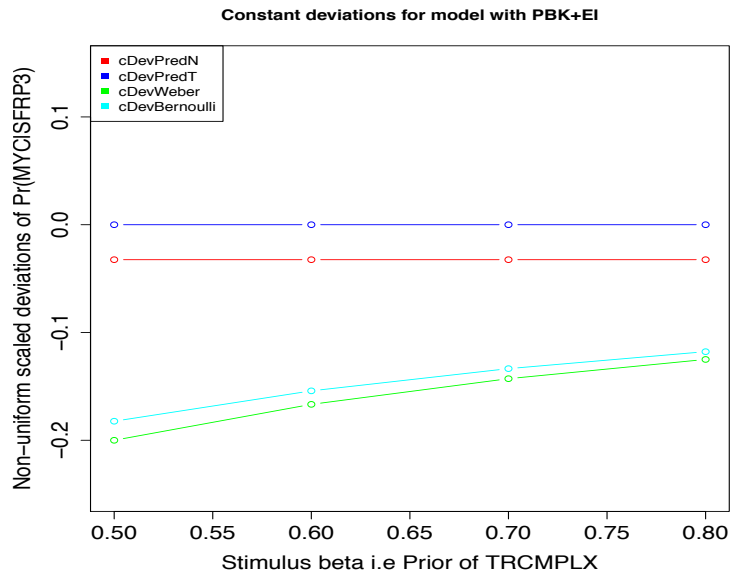

Figure 11: Same as figure 10 but for  $\Pr(MYC|SFRP3)$ .

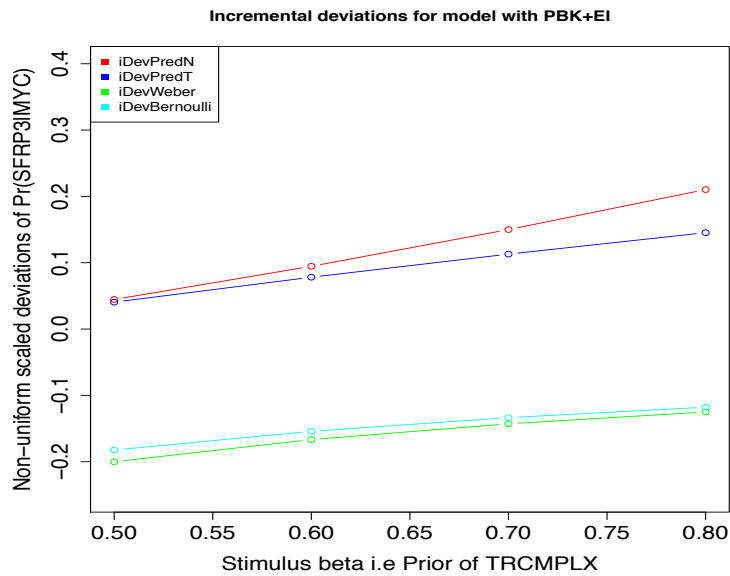

Figure 12: Same as figure 10 but for  $\Pr(SFRP3|MYC)$ . Instead of constant deviations, incremental deviations are represented.

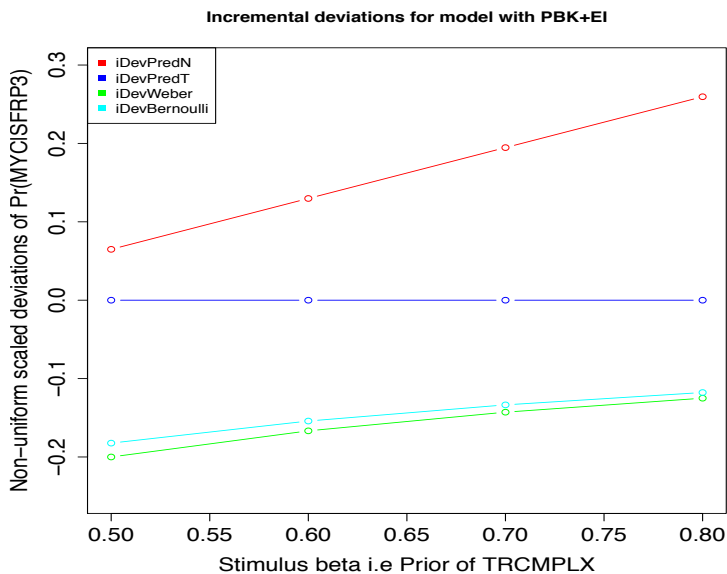

Figure 13: Same as figure 10 but for  $\Pr(MYC|SFRP3)$ . Instead of constant deviations, incremental deviations are represented.

Deviation study for *SFRP2* and *CD44* for normal case

| $\beta$ | $\Delta\beta$ | $\frac{\Delta\beta}{\beta}$ | $\log(1 + \frac{\Delta\beta}{\beta})$ | $\Delta\gamma$<br>$\Pr(SFRP2 CD44)$ | $\Delta\gamma$<br>$\Pr(CD44 SFRP2)$ |
|---------|---------------|-----------------------------|---------------------------------------|-------------------------------------|-------------------------------------|
| 0.8     | 0.1           | 0.125                       | 0.117783                              | -0.0007505445                       | 0.0002943409                        |
| 0.7     | 0.1           | 0.1428571                   | 0.1335314                             | -0.0009398116                       | 0.0002943409                        |
| 0.6     | 0.1           | 0.1666667                   | 0.1541507                             | -0.0011360011                       | 0.0002943409                        |
| 0.5     | 0.1           | 0.2                         | 0.1823216                             | -0.0013397022                       | 0.0002943409                        |
| 0.8     | 0.1           | 0.125                       | 0.117783                              | -0.004166059                        | 0.0011773636                        |
| 0.7     | 0.2           | 0.2857143                   | 0.2513144                             | -0.003415515                        | 0.0008830227                        |
| 0.6     | 0.3           | 0.5                         | 0.4054651                             | -0.002475703                        | 0.0005886818                        |
| 0.5     | 0.4           | 0.8                         | 0.5877867                             | -0.001339702                        | 0.0002943409                        |

Table 9: Deviation study for  $\Pr(SFRP2|CD44)$  and  $\Pr(CD44|SFRP2)$  for normal case

826 interactions are marked in red colour in figure 9.

827 **Case: Dual interactions with  $\theta = \theta_N$**

828 The dual interactions revealed using weighted means indicate an important  
829 phenomena between any two genes. These interactions reveal that gene acti-  
830 vation interplay might not always be constant for normal (tumour) samples.  
831 These in silico observations imply that a gene that was found to be actively

Deviation study for *SFRP2* and *CD44* for tumor case

| $\beta$ | $\Delta\beta$ | $\frac{\Delta\beta}{\beta}$ | $\log(1 + \frac{\Delta\beta}{\beta})$ | $\Delta\gamma$    |                   |
|---------|---------------|-----------------------------|---------------------------------------|-------------------|-------------------|
|         |               |                             |                                       | $\Pr(SFRP2 CD44)$ | $\Pr(CD44 SFRP2)$ |
| 0.8     | 0.1           | 0.125                       | 0.117783                              | 0.02291329        | 0.01491512        |
| 0.7     | 0.1           | 0.1428571                   | 0.1335314                             | 0.02132802        | 0.01491512        |
| 0.6     | 0.1           | 0.1666667                   | 0.1541507                             | 0.01962443        | 0.01491512        |
| 0.5     | 0.1           | 0.2                         | 0.1823216                             | 0.01779600        | 0.01491512        |
| 0.8     | 0.1           | 0.125                       | 0.117783                              | 0.08166175        | 0.05966047        |
| 0.7     | 0.2           | 0.2857143                   | 0.2513144                             | 0.05874846        | 0.04474535        |
| 0.6     | 0.3           | 0.5                         | 0.4054651                             | 0.03742044        | 0.02983024        |
| 0.5     | 0.4           | 0.8                         | 0.5877867                             | 0.01779600        | 0.01491512        |

Table 10: Deviation study for  $\Pr(SFRP2|CD44)$  and  $\Pr(CD44|SFRP2)$  for tumor case

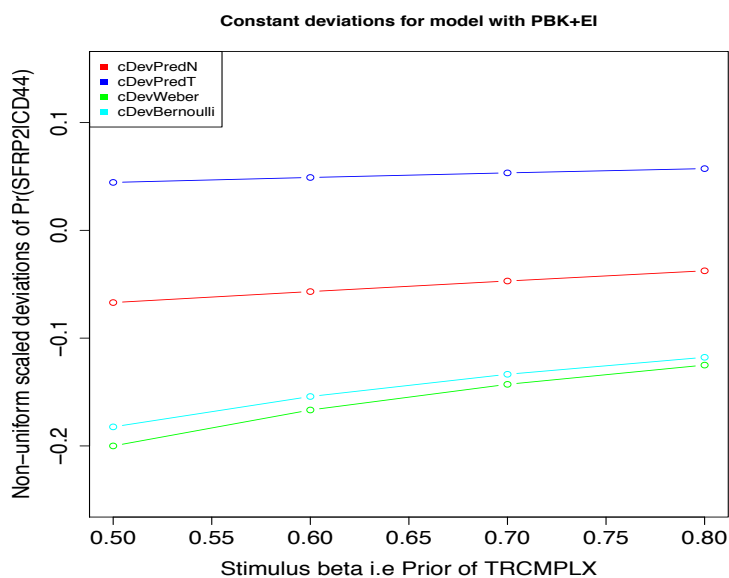

Figure 14: Constant deviations in  $\beta$  i.e ETGN and corresponding deviations in  $\Pr(SFRP2|CD44)$  for both normal and tumor test samples. Corresponding Weber and Bernoulli deviations were also recorded. Note that the plots and the y-axis depict scaled deviations to visually analyse the observations. The model used is  $\mathcal{M}_{PBK+EI}$ . Red - deviation in  $\Pr(SFRP2|CD44)$  in Normal case using Weber's law, Blue - deviation in  $\Pr(SFRP2|CD44)$  in Tumor using Weber's law, Green - constant deviation in Webers law, Cyan - constant deviation in Bernoullis law.

832 expressed in normal sample might reverse activity at some stage or the other  
 833 (an vice versa). Here, one such interaction is discussed in detail. Interpretations

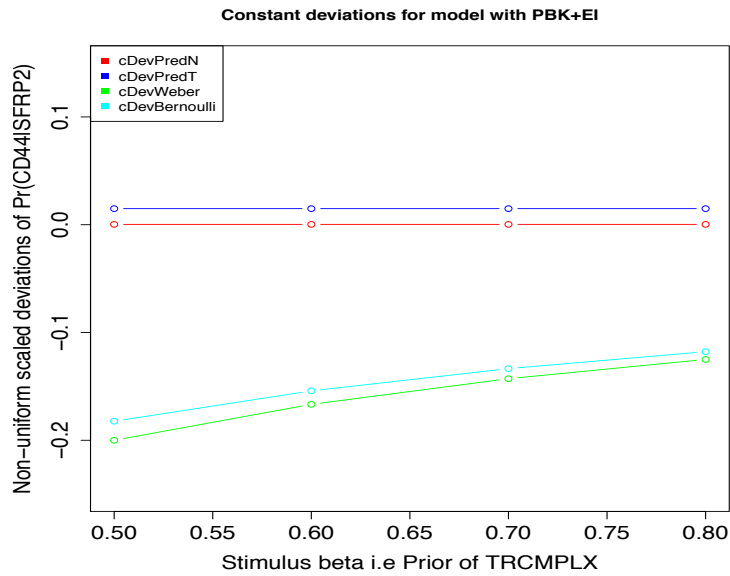

Figure 15: Same as figure 14 but for  $\Pr(CD44|SFRP2)$ .

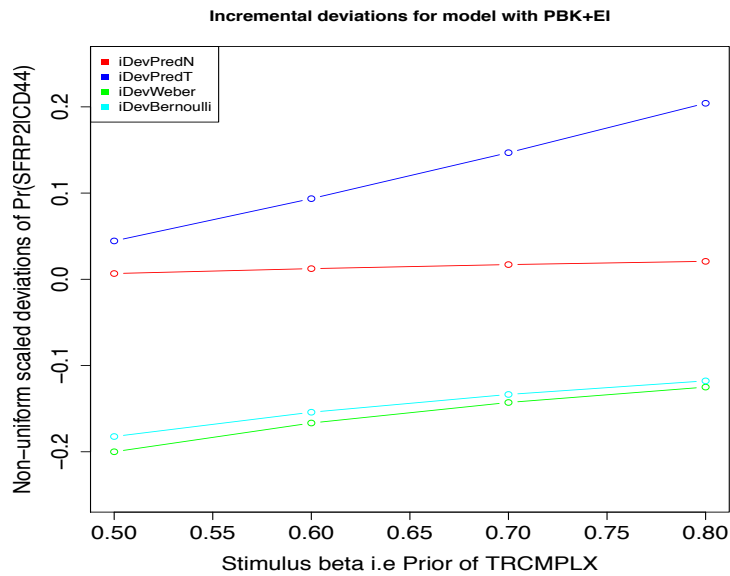

Figure 16: Same as figure 14 but for  $\Pr(SFRP2|CD44)$ . Instead of constant deviations, incremental deviations are represented.

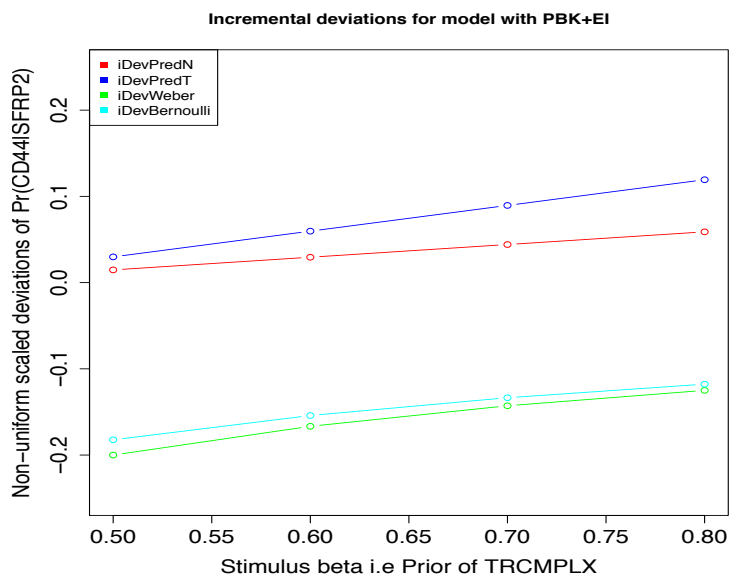

Figure 17: Same as figure 15 but for  $\Pr(CD44|SFRP2)$ . Instead of constant deviations, incremental deviations are represented.

834 of the other dual interactions can be done in the same way. Results for other  
835 interactions are available but not presented here.

836 Also, a point to be observed is that the weighted means show much more  
837 crisp discretization during inference of gene-gene interaction in comparison to  
838 use of an arbitrary value of 0.5. To determine this distinction between the in-  
839 ferred gene-gene interactions obtained via weighted threshold and the arbitrary  
840 threshold of 0.5, the receiver operator curves (ROC) along with its correspond-  
841 ing area under the curve (AUC) are plotted. The ROCs are plotted using the  
842 discretized predicted values and the discretized labels obtained using the thresh-  
843 olds (computed from the training data) on the test data. The ROC graphs and  
844 their respective AUC values indicate how the predictions on the test data be-  
845 haved under different values assigned to the TRCMPLX while training. Ideally,  
846 high values of AUC and steepness in ROC curve indicate good quality results.  
847 Finally, two sample Kolmogorov-Smirnov (KS) test was employed to measure  
848 the statistical significance between the distribution of predictions. If the cumu-  
849 lative distributions are not similar the KS test returns a small p-value. This  
850 small p-value indicates the existing statistical significance between the distribu-  
851 tions under consideration.

852 Finally the ROC plots and AUC values for dual gene-gene interactions are  
853 also plotted and KS test is conducted to find the existence of statistical signif-  
854 icance if any. These reveal the significance of existence of dual interactions in  
855 the signaling pathway which might not have been revealed using the arbitrary

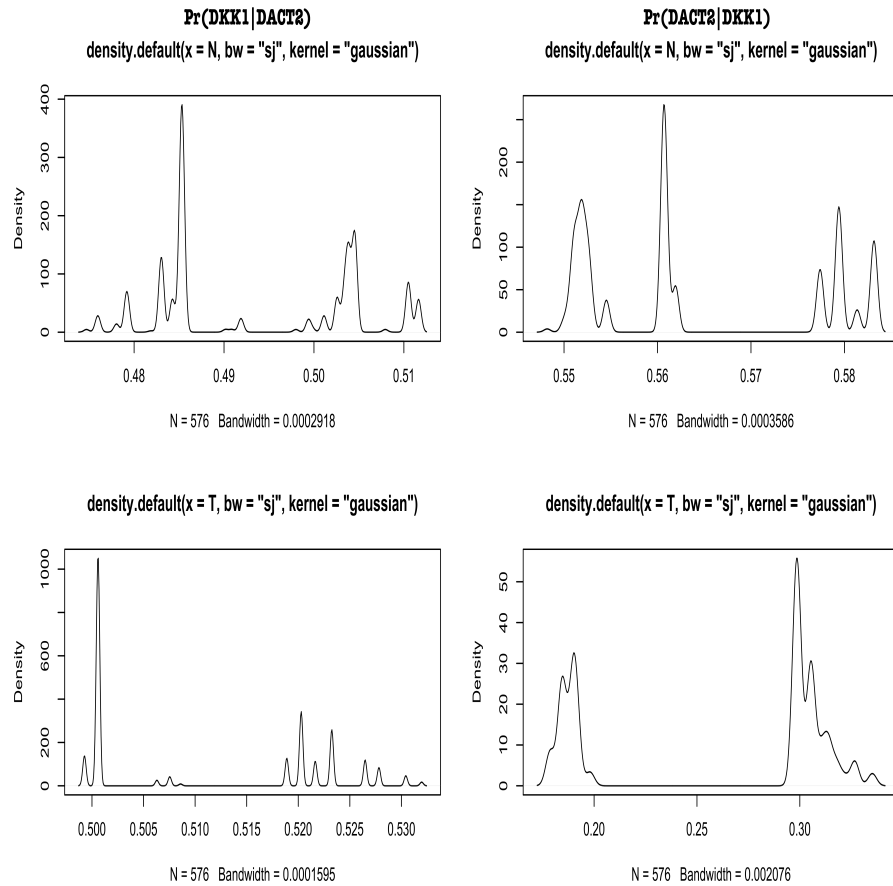

Figure 18: Kernel density estimates for predicted  $\Pr(DKK1|DACT2)$  and  $\Pr(DACT2|DKK1)$  in Normal and Tumor cases. Gaussian kernel is used for smoothing the density estimate. The bandwidth of the kernel is selected using the pilot estimation of derivative as proposed by Sheather and Jones (1991) and implemented in R programming language.

856 threshold value of 0.5. Plots are made using functions from the PRROC package  
 857 provided by Grau et al. (2015).

858 **Interaction between DKK1 and DACT2 using  $\theta \in \{\theta_N, \theta_T\}$**  - Dual inter-  
 859 actions  $DACT2 \langle \rangle - \langle \rangle DKK1$  and  $DKK1| - \langle \rangle DACT2$  ( $DACT2| -$   
 860  $|DKK1$  and  $DKK1 \langle \rangle -|DACT2$ ) in normal (tumor) sample were found as  
 861 depicted in figure 9. Figure 18 shows the kernel density estimate of the pre-  
 862 dicted conditional probabilities for both normal and tumor test cases. Using  
 863 the weighted mean of the discretized values of the test samples (discretization  
 864 done using median estimated from the training data as mentioned before), the  
 865 predicted  $\Pr(DKK1|DACT2)$  and  $\Pr(DACT1|DKK1)$  are classified as active

866 or passive. It might be useful to note that instead of using 0.5 as an arbitrary value, the weighted mean captures the distribution of labels in a much more realistic manner and helps infer interactions among the factors in the Wnt pathway.

870 Note the distributions depicted in figure 18. In the first column of the figure, the median for  $\Pr(DKK1|DACT2)$  in normal (tumor) case is 0.4853088 (0.5006437). These medians point to the mid value of the belief in the gene-gene interaction depicted by the range of predicted conditional probabilities. The weighted threshold  $\theta_N^{DKK1}$  ( $\theta_T^{DKK1}$ ) based on labels for normal (tumor) test case was estimated at 0.5138889 (0.4861111). The estimations come from the following computations in equation 9 -

$$\begin{aligned}\theta_N^{DKK1} &= \frac{1 \times n_{1,N} + 2 \times n_{2,N}}{(1 + 2) \times (n_{1,N} + n_{2,N})} = \frac{1 \times 264 + 2 \times 312}{3 \times 576} = 0.5138889 \\ \theta_T^{DKK1} &= \frac{1 \times n_{1,T} + 2 \times n_{2,T}}{(1 + 2) \times (n_{1,T} + n_{2,T})} = \frac{1 \times 312 + 2 \times 264}{3 \times 576} = 0.4861111 \quad (9)\end{aligned}$$

877 Similarly, in the second column of the figure, the median for  $\Pr(DACT2|DKK1)$  in normal (tumor) case is 0.5606946 (0.2985911). The weighted threshold  $\theta_N^{DACT2}$  ( $\theta_T^{DACT2}$ ) based on labels for normal (tumor) test case was estimated at 0.4583333 (0.5416667). The estimations come from the following computations in equation 10 -

$$\begin{aligned}\theta_N^{DACT2} &= \frac{1 \times n_{1,N} + 2 \times n_{2,N}}{(1 + 2) \times (n_{1,N} + n_{2,N})} = \frac{1 \times 360 + 2 \times 216}{3 \times 576} = 0.4583333 \\ \theta_T^{DACT2} &= \frac{1 \times n_{1,T} + 2 \times n_{2,T}}{(1 + 2) \times (n_{1,T} + n_{2,T})} = \frac{1 \times 216 + 2 \times 360}{3 \times 576} = 0.5416667 \quad (10)\end{aligned}$$

882 It can be observed that the discretization is more realistic and strict using the weighted threshold rather than using the arbitrary value of 0.5. The multiple peaks point to the different frequencies at which the predicted probabilities were recorded. Note that the probabilities here represent the belief in the activation status and the discretization only calibrates the belief into active and repressed state. To evaluate the results further wet lab tests are needed.

888 Using these distributions and distributions obtained using arbitrary value, the respective ROC are plotted and corresponding AUC values estimated. Finally, KS test is used to find the existence of statistical significance between the valid permutations of the distributions. These estimates further help derive insights about the interactions at a computational level. Figure 19 shows the ROC plots and the respective AUC values for the dual interactions observed via the in silico experiments. The following are compared -

- 895 1. labels of test data  $ge_N$  and discretized values of  $\Pr(DKK1|DACT2)$  and  $\Pr(DACT2|DKK1)$  using weighted mean in Normal case
- 896 2. labels of test data  $ge_T$  and discretized values of  $\Pr(DKK1|DACT2)$  and  $\Pr(DACT2|DKK1)$  using weighted mean in Tumor case

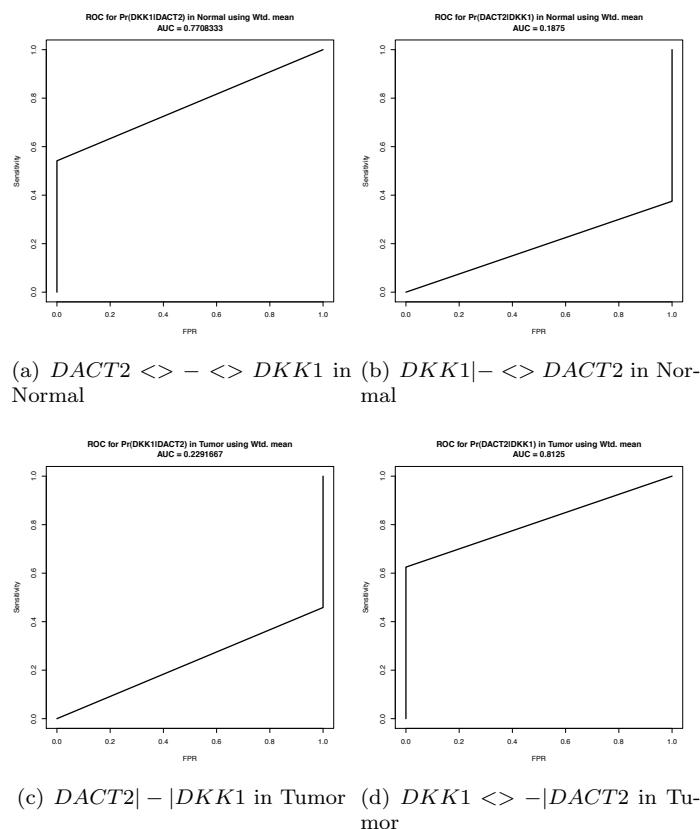

Figure 19: Column wise ROCs for  $\Pr(DKK1|DACT2)$  (1<sup>st</sup> column) and  $\Pr(DACT2|DKK1)$  (2<sup>nd</sup> column) have been plotted with ETGN value for the 90%. Row wise the plots depict the curves generated using weighted mean for Normal case and weighted mean for Tumor case. Respective AUC values for the ROC curves appear on the title of each of the graphs.

899 In figure 19 column wise the ROCs for  $\Pr(DKK1|DACT2)$  (1<sup>st</sup> column) and  
 900  $\Pr(DACT2|DKK1)$  (2<sup>nd</sup> column) have been plotted with ETGN value for the  
 901 90%. Row wise the plots depict the curves generated using weighted mean  
 902 for Normal case and weighted mean for Tumor case. It can be seen that us-  
 903 ing the weighted mean, the subfigure 19(a) and 19(d) convey a good guess  
 904 regarding the type of interaction prevailing in normal and tumor case. Thus  
 905  $DACT2 \langle \rangle - \langle \rangle DKK1$  i.e  $\Pr(DKK1|DACT2)$  is highly favoured in Nor-  
 906 mal case while  $DKK1 \langle \rangle - |DACT2$  i.e  $\Pr(DACT2|DKK1)$  is highly favoured  
 907 in Tumor case. Why this is so is because the normal cases show better results  
 908 in terms of prediction in comparison to the tumor cases. This points to the  
 909 fact that the interaction  $DACT2 \langle \rangle - \langle \rangle DKK1$  is strongly supported in  
 910 the normal case in comparison to  $DACT2| - |DKK1$  which is weakly sup-  
 911 ported in the tumor case. Even though the algorithm showed that interaction



912 was reversible at computational level, ROC curves and corresponding AUC values  
913 indicate weakness in the belief that  $DACT2|-|DKK1$  prevails in tumor  
914 cases. On the other hand, the interaction depicted by  $\Pr(DACT2|DKK1)$   
915 shows higher predictive quality in the tumor case with respect to the normal  
916 case. This means that  $DKK1 \langle \rangle -|DACT2$  has more weight in tumor  
917 case than its reversible  $DKK1|- \langle \rangle DACT2$  counterpart in the normal  
918 case. Taken together, the dual interactions do exist but with different  
919 strengths of belief as shown conditional probability values. The curves in sub-  
920 figure 19(b) and 19(c) indicate a bad guess and thus do not support the in-  
921 teractions  $DKK1|- \langle \rangle DACT2$  i.e  $\Pr(DACT2|DKK1)$  in Normal case and  
922  $DACT2|-|DKK1$  i.e  $\Pr(DKK1|DACT2)$  in Tumor case.

### 923 **Interaction between DKK1 and DACT2 using $\theta = 0.5$**

924 In comparison to use of the weighted  $\theta$ , the analysis of single interaction  
925 using  $\theta = 0.5$  is also presented. Figure 8 shows the interaction between  $DKK1$   
926 and  $DACT2$  as  $DACT2 \langle \rangle -|DKK1$ , i.e  $\Pr(DKK1|DACT2)$ . Using a 0.5  
927 threshold on 18 it is possible to see that discretization of kernel density estimates  
928 of  $\Pr(DKK1|DACT2)$  induces a degree of belief which is not exactly 0(1).  
929 This is not the case with  $\Pr(DACT2|DKK1)$ , were the discretization leads  
930 to an exact 0(1) which removes the degree of belief. Bayesian networks often  
931 represent the degree of belief in terms of some real valued number and exact  
932 probabilities of 0(1) are considered with suspicion.

933 Figure 20 shows the ROC plots and the respective AUC values for the dual  
934 interactions observed via the in silico experiments. The following are compared  
935 -

- 936 1. labels of test data  $ge_N$  and discretized values of  $\Pr(DKK1|DACT2)$  and  
937  $\Pr(DACT2|DKK1)$  using arbitrary value of 0.5 in Normal case
- 938 2. labels of test data  $ge_T$  and discretized values of  $\Pr(DKK1|DACT2)$  and  
939  $\Pr(DACT2|DKK1)$  using arbitrary value of 0.5 in Tumor case

940 In figure 20 column wise the ROCs for  $\Pr(DKK1|DACT2)$  (1<sup>st</sup> column) and  
941  $\Pr(DACT2|DKK1)$  (2<sup>nd</sup> column) have been plotted with ETGN value for the  
942 90%. Row wise the plots depict the curves generated using arbitrary thresh-  
943 old of 0.5 for Normal case and Tumor case. It can be seen that using the  
944 a value of 0.5, the subfigure 20(a) conveys a negligibly good guess regarding  
945 the type of interaction prevailing in normal. Thus  $DACT2 \langle \rangle -|DKK1$  i.e  
946  $\Pr(DKK1|DACT2)$  is highly favoured in Normal case. On the other hand the  
947 20(c) conveys a very bad guess regarding the reversal of interaction in Tumor  
948 case for  $\Pr(DKK1|DACT2)$ . Finally, it was noted that the degree of belief  
949 in  $\Pr(DACT2|DKK1)$  was not at all recorded via thresholding. Thus even  
950 though 20(b) and 20(d) show recorded ROCs but the discretization of 0.5 does  
951 not capture the involved interaction. Thus the arbitrary value of 0.5 is not a  
952 good factor for inferring interactions.

953 Comparing figures 20 and 19, it is clear that the later gives a better guess  
954 in terms of the interpretation of the interaction obtained by discretizing the  
955 kernel density estimates of inferred conditional probabilities. To evaluate the  
956 statistical significance of the predicted probabilities, the values of the KS test

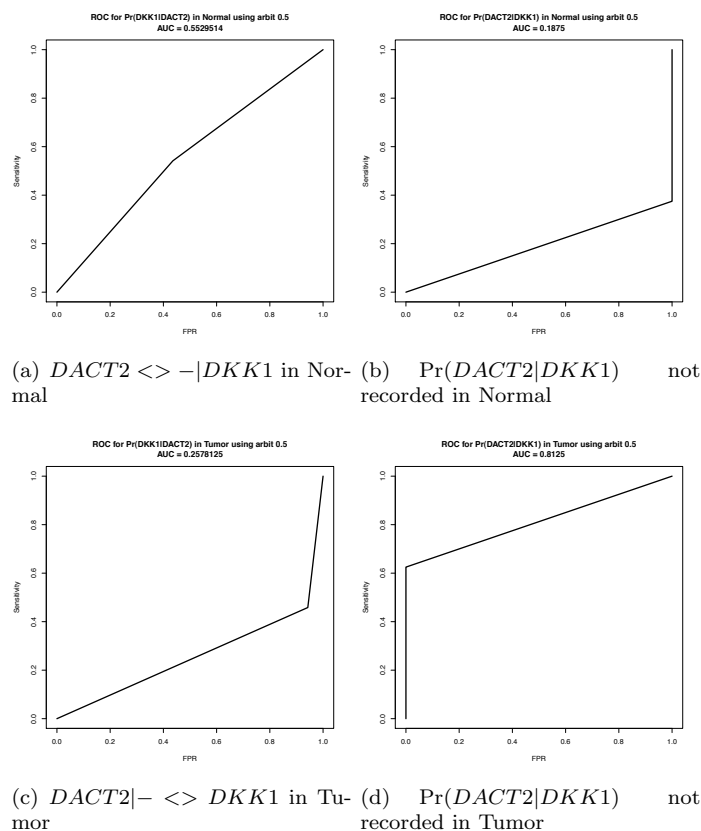

Figure 20: Column wise ROCs for  $\Pr(DKK1|DACT2)$  ( $1^{st}$  column) and  $\Pr(DACT2|DKK1)$  ( $2^{nd}$  column) have been plotted with ETGN value for the 90%. Row wise the plots depict the curves generated using arbit value of 0.5 for Normal case and arbit value of 0.5 for Tumor case. Respective AUC values for the ROC curves appear on the title of each of the graphs.

957 are tabulated and analyzed. Table 11 represents the computed values. The  
 958 first four rows show the existing significance between the predictions for which  
 959 the ROC curves have be plotted and described earlier. The next describes the  
 960 significance between predictions based on thresholds for both normal and tu-  
 961 mor cases. Note that some tests show no significance at all as is the case with  
 962  $\Pr(DACT2|DKK1)$ . In general, significance values differ depending on differ-  
 963 ent interactions. Finally, significance values between interactions are also tabu-  
 964 lated. It was found that there exists statistical difference between the inferred  
 965 dual interactions as shown by the low p-values. Similar interpretations can be  
 966 derived and respective measures can be plotted from the in silico observations.

| Kolmogorov-Smirnov test                                                |                                    |                                      |                                    |                                      |
|------------------------------------------------------------------------|------------------------------------|--------------------------------------|------------------------------------|--------------------------------------|
| Sr. No.                                                                | Discretized Val. vs Labels         | p-value                              | Discretized Val. vs Labels         | p-value                              |
|                                                                        | Pr( $DKK1 DACT2$ )                 |                                      | Pr( $DACT2 DKK1$ )                 |                                      |
| 1.                                                                     | wtd. mean (N) vs $ge_N$            | D = 0.5417<br>p-value < $2.2e^{-16}$ | wtd. mean (N) vs $ge_N$            | D = 0.625<br>p-value < $2.2e^{-16}$  |
| 2.                                                                     | wtd. mean (N) vs $ge_N$            | D = 0.1059<br>p-value = 0.003129     | wtd. mean (N) vs $ge_N$            | D = 0.625<br>p-value < $2.2e^{-16}$  |
| 3.                                                                     | wtd. mean (N) vs $ge_T$            | D = 0.5417<br>p-value < $2.2e^{-16}$ | wtd. mean (T) vs $ge_T$            | D = 0.625<br>p-value < $2.2e^{-16}$  |
| 4.                                                                     | wtd. mean (N) vs $ge_T$            | D = 0.4844<br>p-value < $2.2e^{-16}$ | wtd. mean (T) vs $ge_T$            | D = 0.625<br>p-value < $2.2e^{-16}$  |
| KS test between predictions using wtd. mean and arbitrary value of 0.5 |                                    |                                      |                                    |                                      |
| Sr. No.                                                                | Pr( $DKK1 DACT2$ )                 | KS value                             | Pr( $DKK2 DACT1$ )                 | KS value                             |
| 1.                                                                     | wtd. mean vs arbit. (N)            | D = 0.4358<br>p-value < $2.2e^{-16}$ | wtd. mean vs arbit. (N)            | D = 0<br>p-value = 1                 |
| 2.                                                                     | wtd. mean vs arbit. (T)            | D = 0.0573<br>p-value = 0.3009       | wtd. mean vs arbit. (T)            | D = 0<br>p-value = 1                 |
| KS test between predictions of interactions $I_1$ and $I_2$            |                                    |                                      |                                    |                                      |
| 1.                                                                     | wtd. mean - $I_1$ (N) vs $I_2$ (N) | D = 1<br>p-value < $2.2e^{-16}$      | wtd. mean - $I_1$ (T) vs $I_2$ (T) | D = 1<br>p-value < $2.2e^{-16}$      |
| 2.                                                                     | arbit. - $I_1$ (N) vs $I_2$ (N)    | D = 0.5642<br>p-value < $2.2e^{-16}$ | arbit. - $I_1$ (T) vs $I_2$ (T)    | D = 0.9427<br>p-value < $2.2e^{-16}$ |

Table 11: Kolmogorov-Smirnov test indicating statistical significance between the distribution of predictions. Statistical significance is evaluated by observing the p-value. Small p-value indicates that significant difference. Significance test is conducted between (1) discretized values of predictions and existing test labels (2) discretized values of predictions based on weighted threshold and discretized values of predictions based on arbit threshold and (3) between predictions representing the dual interactions (obtained using both thresholds).  $I_1$  and  $I_2$  correspond to interactions inferred from Pr( $DKK1|DACT2$ ) and Pr( $DACT2|DKK1$ ), respectively.

## 967 7. Caveats

968 This work does not take into account the time series data which contains  
969 much more crucial information rather than the static data of gene expression.  
970 The inferences have been made regarding a natural phenomena based on the  
971 exploration of a computational causal model via sensitivity analysis. The results  
972 discussed are based on deviations of inferred conditional probabilities which en-  
973 code a degree of belief in the occurrence of an event. Even if dynamic bayesian  
974 models are used, the observations will be made on degree of beliefs only. Also,  
975 the current bayesian network model does not encode the cyclic feedback loops.  
976 This has serious implications in the fact that the model might not capture cor-  
977 rect interactions. The problem can be overcome to a certain extent by encoding  
978 the biological knowledge such that concepts of  $d$ -connectivity/separability ex-  
979 ploit the inherent prior knowledge and thus help in proper inferences. More  
980 specifically, the model captures a snapshot in time but by varying the param-  
981 eters or the prior/conditional probability tables, it is possible to verify the natural  
982 phenomena under investigation.

## 983 8. Future directions

984 In context of the above observations, dynamic models might reveal greater in-  
985 formation regarding the psychophysical laws. Work by Goentoro and Kirschner  
986 (2009) employs sensitivity analysis methods to reveal such laws by tuning sin-  
987 gle parameters. There might be a few ways to measure fold change in single  
988 an multi parameter settings. Future work might involve deeper study of the  
989 phenomena based on multi-parameter setting in a dynamic bayesian network  
990 model. If one incorporates nodes in between two time snapshots of  $\beta$ -catenin  
991 concentration in a dynamic bayesian network, one might be able to measure  
992 the changes at different phases of the signaling pathway. For example, in figure  
993 21 a set of nodes measuring the different concentrations of  $\beta$ -catenin (say  $N$ )  
994 are depicted. In a dynamic bayesian network, the previous concentration at  $t$   
995 is connected to the next concentration at  $t + 1$ . Also, to measure the effect of  
996 difference ( $\Delta N$ ), a change in concentration can be measured. Computations  
997 regarding fold change ( $\Delta N$ ) could then be estimated as posterior probabilities  
998 given the two concentrations, which the Bayesian networks can easily handle.  
999 In case more parameters need to be involved (say the effect of Wnt and APC  
1000 together), nodes might be added as shown below. Then the fold change is  
1001 conditional on  $N(t + 1)$ ,  $N(t + 2)$ ,  $\Delta Wnt$  and  $\Delta APC$  and is estimated as  
1002  $\Pr(\Delta N(t + 1) | N(t + 1), N(t + 2), \Delta Wnt, \Delta APC)$ .

1003 Regarding sensitivity analysis, in nonlinear problems, it might be useful to  
1004 use Sobol' (1990) indices to estimate the sensitivity of the parameters. These  
1005 indices are a way to estimate the changes in a multiparameter setting thus  
1006 helping one to conduct global sensitivity analysis instead of local sensitivity  
1007 analysis Glen and Isaacs (2012). Finally, with respect to the robustness of the  
1008 gene-gene interaction network, the current work employs a very simple algorithm  
1009 to construct the network and infer preserved interactions across the range of  
1010 values set for a particular parameter. This helps in eliminating interactions  
1011 that do not contribute enough biological information in the pathway or are non  
1012 existant and require further analysis by integration of more data. Work in these  
1013 lines would require incorporation of bigger datasets.

## 1014 9. Conclusions

1015 In this preliminary work via sensitivity analysis, the variation in predictive  
1016 behaviour of  $\beta$ -catenin based transcription complex conditional on gene evi-  
1017 dences is shown to follow power-logarithmic psychophysical law crudely. This  
1018 implies deviations in output are proportional to increasing function of devia-  
1019 tions in the input and show constancy for higher values of input. This points  
1020 towards stability in the behaviour of transcriptional activity downstream of the  
1021 Wnt pathway. As a further development, computational analysis shows that  
1022 the preserved gene-gene interactions are also subject to these power-logarithmic  
1023 psychophysical laws. The prevalence of these laws is reported for interaction  
1024 between elements of pairs of ( $SFRP3$ ,  $MYC$ ), ( $SFRP2$ ,  $CD44$ ) and ( $DKK1$ ,  
1025  $DACT2$ ). As a precursor to the analysis of these laws at interaction level,

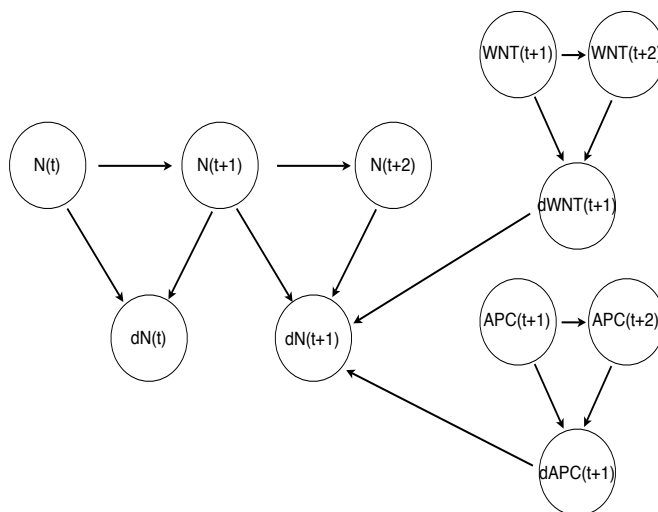

Figure 21: A schematic diagram of a dynamic Bayesian network model that might help study the fold change and the logarithmic psychophysical laws behind the changes.

1026 the biologically inspired epigenetically influenced computational causal models  
1027 were used to infer gene-gene interaction from conditional probabilities of indi-  
1028 vidual gene activation given the status of another gene activation. In relation  
1029 of colorectal cancer cases, it is now possible to infer the type of interaction that  
1030 might be happening among the genes at a pair wise level using BN models and  
1031 further wet lab studies can be developed to investigate the inferred prevalence  
1032 of power-logarithmic psychophysical laws at interaction level within the path-  
1033 way. To assert the fact, in a recent development via wet lab experiments by  
1034 Olsman and Goentoro (2016), it has been confirmed that there are existence  
1035 of sensors that behave in a logarithmic fashion. The wet lab work by Olsman  
1036 and Goentoro (2016) supports the earlier proposed crude postulates based on  
1037 computational sensitivity analysis of this manuscript regarding the existence of  
1038 logarithmic behaviour in the signaling pathways. It also signifies the impor-  
1039 tance of systems biology approach where in silico experiments combined with  
1040 in vivo/in vitro experiments have the power to explore the deeper mechanisms  
1041 of a signaling pathway.

#### 1042 **Acknowledgement**

1043 Thanks to - • Dr. Uri Alon from Weizmann Institute of Science, Israel, for  
1044 lively and critical discussion on behaviour of curves at the International Con-  
1045 ference on Systems Biology of Human Disease (2015), held at German Cancer

1046 Research Center in Heidelberg, Germany. • Dr. Silja Renooij for providing  
1047 useful feedback and editing the manuscript. • the Royal Society of Chemistry  
1048 (RSC) for giving permission to reproduce parts of material in S. Sinha, Integr.  
1049 Biol., 2014, DOI: 10.1039/C4IB00124A. • all anonymous reviewers who have  
1050 helped in refining this manuscript.

## 1051 Declaration of Interest

1052 No conflict of interest.

## 1053 Appendix

### 1054 9.1. Steps for construction of gene gene interaction networks

1055 Before starting the construction of interactions from the conditional prob-  
1056 abilities, assign a variable  $gg_I$  as an empty list (say in R language). Then  $\forall i$   
1057 genes, execute the following -

- 1058 1.  $\forall$  576 runs iterated by a counter  $j$ 
  - 1059 (a) append  $x_N$  with the vector whose elements are  $\Pr(g_i = \text{active}|g_k$   
1060 evidence)  $\forall k$  genes in the  $j^{\text{th}}$  run for Normal test sample. This creates  
1061 a matrix at the end of the runs.
  - 1062 (b) append  $x_T$  with the vector whose elements are  $\Pr(g_i = \text{active}|g_k$   
1063 evidence)  $\forall k$  genes in the  $j^{\text{th}}$  run for Tumor test sample. This creates  
1064 a matrix at the end of the runs.
  - 1065 (c) append  $ge_N$  with the vector whose elements are  $ge_k$  evidence  $\forall k$  genes  
1066 in the  $j^{\text{th}}$  run for Normal test sample. This creates a matrix at the  
1067 end of the runs.
  - 1068 (d) append  $ge_T$  with the vector whose elements are  $ge_k$  evidence  $\forall k$  genes  
1069 in the  $j^{\text{th}}$  run for Tumor test sample. This creates a matrix at the  
1070 end of the runs.
- 1071 2. assign variables  $ge, aa_N, ar_N, ra_N, rr_N, aa_T, ar_T, ra_T, rr_T, PggN, PggT$   
1072 to an empty vector  $c()$  (say in R language). Note - a (r) means activation  
1073 (repression).
- 1074 3. compute mean across columns of  $x_N$  and  $x_T$  to obtain averaged  $\widehat{\Pr}_N(g_i|g_k)$   
1075 and  $\widehat{\Pr}_T(g_i|g_k) \forall k$  gene evidences and  $\forall i$  genes. Note  $k, i \in 1, \dots, n$  if  $n$  is  
1076 the total number of genes.
- 1077 4. assign a vector of  $\widehat{\Pr}_N(g_i|g_k) \forall k$  genes to  $PggN$  and a vector of  $\widehat{\Pr}_T(g_i|g_k)$   
1078  $\forall k$  genes to  $PggT$
- 1079 5.  $\forall k$  genes except the  $i^{\text{th}}$  one
  - 1080 (a) if ( $k \neq i$ )
    - 1081 i. assign variables  $tmpaa_N, tmpar_N, tmpra_N, tmprrr_N, tmpaa_T,$   
1082  $tmpar_T, tmpra_T$  and  $tmprrr_T$  to 0.
    - 1083 ii. assign threshold values  $\theta$  to either a fixed value (say 0.5) or a  
1084 weighted mean.

1085 iii. if assigning a weighted mean, compute the threshold  $\theta_N$  as the  
1086 weighted mean of the labels of the test data i.e evidences for the  
1087  $i^{th}$  gene, in the case of Normal samples (top formula in equation  
1088 8). Similarly, compute the threshold  $\theta_T$  as the weighted mean of  
1089 the labels of the test data i.e evidences for the  $i^{th}$  gene, in the  
1090 case of Tumor samples (bottom formula in equation 8).  
1091 iv.  $\forall$  576 runs iterated by a counter  $l$   
1092 A. if( $ge_N[l,k] == 1$  and  $x_N[l,k] < \theta$ ) increment  $tmprrr_N$  by 1  
1093 B. else if( $ge_N[l,k] == 1$  and  $x_N[l,k] \geq \theta$ ) increment  $tmpar_N$   
1094 by 1  
1095 C. else if( $ge_N[l,k] == 2$  and  $x_N[l,k] < \theta$ ) increment  $tmpra_N$  by  
1096 1  
1097 D. else if( $ge_N[l,k] == 2$  and  $x_N[l,k] \geq \theta$ ) increment  $tmpaa_N$   
1098 by 1  
1099 E. if( $ge_T[l,k] == 1$  and  $x_T[l,k] < \theta$ ) increment  $tmprrr_T$  by 1  
1100 F. else if( $ge_T[l,k] == 1$  and  $x_T[l,k] \geq \theta$ ) increment  $tmpar_T$   
1101 by 1  
1102 G. else if( $ge_T[l,k] == 2$  and  $x_T[l,k] < \theta$ ) increment  $tmpra_T$  by  
1103 1  
1104 H. else if( $ge_T[l,k] == 2$  and  $x_T[l,k] \geq \theta$ ) increment  $tmpaa_T$   
1105 by 1  
1106 v. Comment - store results  
1107 vi. append  $ge$  with  $g_k$ ,  $rr_N$  with  $tmprrr_N$ ,  $ar_N$  with  $tmpar_N$ ,  $ra_N$   
1108 with  $tmpra_N$ ,  $aa_N$  with  $tmpaa_N$ ,  $rr_T$  with  $tmprrr_T$ ,  $ar_T$  with  
1109  $tmpar_T$ ,  $ra_T$  with  $tmpra_T$  and  $aa_T$  with  $tmpaa_T$   
1110 (b) store the variables in the previous step to a data frame (say in R  
1111 language) to a variable  $stats$ .  
1112 (c) Comment - 1 means aa, 2 means ar, 3 means ra, 4 means rr  
1113 (d) assign variables  $gg_{IN}$  and  $gg_{IT}$  as empty vector []  
1114 (e)  $\forall j$  gene except the  $i^{th}$  one under consideration  
1115 i. find the index  $idx_N$  in stats that corresponds to 1 or 2 or 3 or 4  
1116 ii. if( $idx_N == 1$ ) append  $gg_{IN}$  with interaction string  $stats\{g_j \langle \rangle$   
1117  $- \langle \rangle g_i$   
1118 iii. else if( $idx_N == 2$ ) append  $gg_{IN}$  with interaction string  $stats\{g_e j | - \langle \rangle$   
1119  $g_i$   
1120 iv. else if( $idx_N == 3$ ) append  $gg_{IN}$  with interaction string  $stats\{g_j \langle \rangle$   
1121  $- | g_i$   
1122 v. else if( $idx_N == 4$ ) append  $gg_{IN}$  with interaction string  $stats\{g_j | -$   
1123  $| g_i$   
1124 vi. find the index  $idx_N$  in stats that corresponds to 1 or 2 or 3 or 4  
1125 vii. if( $idx_T == 1$ ) append  $gg_{IT}$  with interaction string  $stats\{g_j \langle \rangle$   
1126  $- \langle \rangle g_i$   
1127 viii. else if( $idx_T == 2$ ) append  $gg_{IT}$  with interaction string  $stats\{g_j | - \langle \rangle$   
1128  $g_i$   
1129 ix. else if( $idx_T == 3$ ) append  $gg_{IT}$  with interaction string  $stats\{g_j \langle \rangle$   
1130  $- | g_i$

1131 x. else if( $idx_T == 4$ ) append  $gg_{IT}$  with interaction string  $stats\{g_j|$ –  
1132  $|g_i$   
1133 (f) assign  $stats\{gg_{IN}$  with  $gg_{IN}$   
1134 (g) assign  $stats\{gg_{IT}$  with  $gg_{IT}$   
1135 (h) Comment -  $i^{th}$  gene influenced  
1136 (i)  $gg_I[[i]] < - \text{list}(ig = g_i, stats = stats, PggN = PggN, PggT =$   
1137  $PggT)$

## 1138 References

- 1139 , .
- 1140 Adler, M., Mayo, A., Alon, U., 2014. Logarithmic and power law input-output relations in sensory  
1141 systems with fold-change detection. *PLoS computational biology* 10, e1003781.
- 1142 Baehs, S., Herbst, A., Thieme, S., Perschl, C., Behrens, A., Scheel, S., Jung, A., Brabletz, T.,  
1143 Göke, B., Blum, H., et al., 2009. Dickkopf-4 is frequently down-regulated and inhibits growth of  
1144 colorectal cancer cells. *Cancer letters* 276, 152–159.
- 1145 Baron, R., Kneissel, M., 2013. Wnt signaling in bone homeostasis and disease: from human muta-  
1146 tions to treatments. *Nature medicine* 19, 179–192.
- 1147 Bayes, M., Price, M., 1763. An essay towards solving a problem in the doctrine of chances. *Philo-*  
1148 *sophical Transactions* 53, 370.
- 1149 Bernoulli, D., 1738. Specimen theoriae novae de mensura sortis. *Commentarii Academiae Scien-*  
1150 *tiarum Imperialis Petropolitanae* 5, 175–192.
- 1151 Blagodatski, A., Poteryaev, D., Katanaev, V., 2014. Targeting the wnt pathways for therapies. *Mol*  
1152 *Cell Ther* 2, 28.
- 1153 Brent, R., Lok, L., 2005. A fishing buddy for hypothesis generators. *Science* 308, 504.
- 1154 Brophy, P., Lang, K., Dressler, G., 2003. The secreted frizzled related protein 2 (*sfrp2*) gene is a  
1155 target of the *pax2* transcription factor. *Journal of Biological Chemistry* 278, 52401–52405.
- 1156 Caldwell, G., Jones, C., Taniere, P., Warrack, R., Soon, Y., Matthews, G., Morton, D., 2006. The  
1157 wnt antagonist *sfrp1* is downregulated in premalignant large bowel adenomas. *British journal of*  
1158 *cancer* 94, 922–927.
- 1159 Charniak, E., 1991. Bayesian networks without tears. *AI magazine* 12, 50.
- 1160 Clevers, H., 2006. Wnt/ $[\beta]$ -catenin signaling in development and disease. *Cell* 127, 469–480.
- 1161 Costello, J., Plass, C., 2001. Methylation matters. *Journal of medical genetics* 38, 285–303.
- 1162 Curtin, J.C., Lorenzi, M.V., 2010. Drug discovery approaches to target wnt signaling in cancer stem  
1163 cells. *Oncotarget* 1, 552.
- 1164 Das, P., Singal, R., 2004. Dna methylation and cancer. *Journal of Clinical Oncology* 22, 4632–4642.
- 1165 Fechner, G.T., 1860. *Elemente der Psychophysik* (2 vols). Breitkopf and Hartel.
- 1166 Feng Han, Q., Zhao, W., Bentel, J., Shearwood, A., Zeps, N., Joseph, D., Iacopetta, B., Dharmara-  
1167 jan, A., 2006. Expression of *sfrp-4* and  $\beta$ -catenin in human colorectal carcinoma. *Cancer letters*  
1168 231, 129–137.
- 1169 Friedman, N., Linial, M., Nachman, I., Pe’er, D., 2000. Using bayesian networks to analyze expres-  
1170 sion data. *Journal of computational biology* 7, 601–620.



- 1171 Garber, K., 2009. Drugging the wnt pathway: problems and progress. *Journal of the National*  
1172 *Cancer Institute* 101, 548–550.
- 1173 Gardner, T., Faith, J., 2005. Reverse-engineering transcription control networks. *Physics of Life*  
1174 *Reviews* 2, 65–88.
- 1175 Glen, G., Isaacs, K., 2012. Estimating sobol sensitivity indices using correlations. *Environmental*  
1176 *Modelling & Software* 37, 157–166.
- 1177 Goentoro, L., Kirschner, M.W., 2009. Evidence that fold-change, and not absolute level, of  $\beta$ -catenin  
1178 dictates wnt signaling. *Molecular Cell* 36, 872–884.
- 1179 González-Sancho, J., Aguilera, O., García, J., Pendás-Franco, N., Peña, C., Cal, S., de Herreros,  
1180 A., Bonilla, F., Muñoz, A., 2004. The wnt antagonist dickkopf-1 gene is a downstream target of  
1181  $\beta$ -catenin/tcf and is downregulated in human colon cancer. *Oncogene* 24, 1098–1103.
- 1182 Grau, J., Grosse, I., Keilwagen, J., 2015. Pprcc: computing and visualizing precision-recall and  
1183 receiver operating characteristic curves in r. *Bioinformatics*, btv153.
- 1184 Gregorieff, A., Clevers, H., 2005. Wnt signaling in the intestinal epithelium: from endoderm to  
1185 cancer. *Genes & development* 19, 877–890.
- 1186 Hartemink, A., Gifford, D., Jaakkola, T., Young, R., 2001. Using graphical models and genomic  
1187 expression data to statistically validate models of genetic regulatory networks, in: *Pac. Symp.*  
1188 *Biocomput*, Citeseer. pp. 422–433.
- 1189 Hoang, B., Moos, M., Vukicevic, S., Luyten, F., 1996. Primary structure and tissue distribution  
1190 of frzb, a novel protein related to drosophila frizzled, suggest a role in skeletal morphogenesis.  
1191 *Journal of Biological Chemistry* 271, 26131–26137.
- 1192 Huang, D., Yu, B., Deng, Y., Sheng, W., Peng, Z., Qin, W., Du, X., 2010. Sfrp4 was overexpressed  
1193 in colorectal carcinoma. *Journal of cancer research and clinical oncology* 136, 395–401.
- 1194 Issa, J., 2007. Dna methylation as a therapeutic target in cancer. *Clinical Cancer Research* 13,  
1195 1634–1637.
- 1196 Jiang, X., Tan, J., Li, J., Kivimäe, S., Yang, X., Zhuang, L., Lee, P., Chan, M., Stanton, L., Liu,  
1197 E., Cheyette, B., Yu, Q., 2008. Dact3 is an epigenetic regulator of wnt/ $\beta$ -catenin signaling in  
1198 colorectal cancer and is a therapeutic target of histone modifications. *Cancer cell* 13, 529–541.
- 1199 Kahn, M., 2014. Can we safely target the wnt pathway? *Nature Reviews Drug Discovery* 13,  
1200 513–532.
- 1201 Kanwar, S., Yu, Y., Nautiyal, J., Patel, B., Majumdar, A., 2010. The wnt/ $\beta$ -catenin pathway  
1202 regulates growth and maintenance of colonospheres. *Molecular cancer* 9, 212.
- 1203 Kivimäe, S., Yang, X., Cheyette, B., 2011. All dact (dapper/frodo) scaffold proteins dimerize and  
1204 exhibit conserved interactions with vangl, dvl, and serine/threonine kinases. *BMC biochemistry*  
1205 12, 33.
- 1206 Kriegl, L., Horst, D., Reiche, J., Engel, J., Kirchner, T., Jung, A., et al., 2010. Lef-1 and tcf4  
1207 expression correlate inversely with survival in colorectal cancer. *J. Transl. Med* 8, 123.
- 1208 Masin, S.C., Zudini, V., Antonelli, M., 2009. Early alternative derivations of fechner's law. *Journal*  
1209 *of History of the Behavioral Sciences* 45, 56–65. doi:10.1002/jhbs.20349.
- 1210 Matsui, A., Yamaguchi, T., Maekawa, S., Miyazaki, C., Takano, S., Uetake, T., Inoue, T., Otaka,  
1211 M., Otsuka, H., Sato, T., et al., 2009. Dickkopf-4 and-2 genes are upregulated in human colorectal  
1212 cancer. *Cancer science* 100, 1923–1930.
- 1213 Murphy, K., et al., 2001. The bayes net toolbox for matlab. *Computing science and statistics* 33,  
1214 1024–1034.

- 1215 Needham, C.J., Bradford, J.R., Bulpitt, A.J., Westhead, D.R., 2007. A primer on learning in  
1216 bayesian networks for computational biology. *PLoS computational biology* 3, e129.
- 1217 Niehrs, C., 2006. Function and biological roles of the dickkopf family of wnt modulators. *Oncogene*  
1218 25, 7469–7481.
- 1219 Olsman, N., Goentoro, L., 2016. Allosteric proteins as logarithmic sensors. *Proceedings of the*  
1220 *National Academy of Sciences*, 201601791.
- 1221 Pearl, J., 1988. Probabilistic reasoning in intelligent systems: networks of plausible inference.  
1222 Morgan Kaufmann.
- 1223 Pearl, J., 2000. Causality: models, reasoning, and inference. Cambridge Univ Pr.
- 1224 Pećina-Šlaus, N., 2010. Wnt signal transduction pathway and apoptosis: a review. *Cancer Cell*  
1225 *International* 10, 1–5.
- 1226 Pendas-Franco, N., Garcia, J., Pena, C., Valle, N., Palmer, H., Heinäniemi, M., Carlberg, C.,  
1227 Jimenez, B., Bonilla, F., Munoz, A., et al., 2008. Dickkopf-4 is induced by tcf/ $\beta$ -catenin and up-  
1228 regulated in human colon cancer, promotes tumour cell invasion and angiogenesis and is repressed  
1229 by  $1\alpha$ , 25-dihydroxyvitamin d3. *Oncogene* 27, 4467–4477.
- 1230 Peterson, C., Laniel, M., et al., 2004. Histones and histone modifications. *Current Biology* 14,  
1231 546–551.
- 1232 Peer, D., Regev, A., Elidan, G., Friedman, N., 2001. Inferring subnetworks from perturbed expres-  
1233 sion profiles. *Bioinformatics* 17, S215.
- 1234 Pinto, D., Gregorieff, A., Begthel, H., Clevers, H., 2003. Canonical wnt signals are essential for  
1235 homeostasis of the intestinal epithelium. *Genes & development* 17, 1709–1713.
- 1236 Rao, T.P., Kühl, M., 2010. An updated overview on wnt signaling pathways a prelude for more.  
1237 *Circulation research* 106, 1798–1806.
- 1238 Reguart, N., He, B., Xu, Z., You, L., Lee, A., Mazieres, J., Mikami, I., Batra, S., Rosell, R., Mc-  
1239 Cormick, F., et al., 2004. Cloning and characterization of the promoter of human wnt inhibitory  
1240 factor-1. *Biochemical and biophysical research communications* 323, 229–234.
- 1241 Roehrig, S., 1996. Probabilistic inference and path analysis. *Decision Support Systems* 16, 55–66.
- 1242 Sachs, K., Gifford, D., Jaakkola, T., Sorger, P., Lauffenburger, D., 2002. Bayesian network approach  
1243 to cell signaling pathway modeling. *Sci. STKE* 148, 38–42.
- 1244 Sachs, K., Perez, O., Pe’er, D., Lauffenburger, D., Nolan, G., 2005. Causal protein-signaling net-  
1245 works derived from multiparameter single-cell data. *Science* 308, 523.
- 1246 Sato, H., Suzuki, H., Toyota, M., Nojima, M., Maruyama, R., Sasaki, S., Takagi, H., Sogabe, Y.,  
1247 Sasaki, Y., Idogawa, M., Sonoda, T., Mori, M., Imai, K., Tokino, T., Shinomura, Y., 2007.  
1248 Frequent epigenetic inactivation of dickkopf family genes in human gastrointestinal tumors. *Carcinogenesis* 28, 2459–2466.
- 1250 Schmidt-Ott, K., Masckauchan, T., Chen, X., Hirsh, B., Sarkar, A., Yang, J., Paragas, N., Wallace,  
1251 V., Dufort, D., Pavlidis, P., et al., 2007.  $\beta$ -catenin/tcf/lef controls a differentiation-associated  
1252 transcriptional program in renal epithelial progenitors. *Development* 134, 3177–3190.
- 1253 Shannon, P., Markiel, A., Ozier, O., Baliga, N., Wang, J., Ramage, D., Amin, N., Schwikowski,  
1254 B., Ideker, T., 2003. Cytoscape: a software environment for integrated models of biomolecular  
1255 interaction networks. *Genome research* 13, 2498–2504.
- 1256 Sharma, R., 1973. Wingless a new mutant in drosophila melanogaster. *Drosophila information*  
1257 *service* 50, 134–134.
- 1258 Sheather, S.J., Jones, M.C., 1991. A reliable data-based bandwidth selection method for kernel  
1259 density estimation. *Journal of the Royal Statistical Society. Series B (Methodological)*, 683–690.

- 1260 Sinha, S., 2014. Integration of prior biological knowledge and epigenetic information enhances  
1261 the prediction accuracy of the bayesian wnt pathway. *Integr. Biol.* 6, 1034–1048. doi:10.1039/  
1262 c4ib00124a.
- 1263 Sobol', I.M., 1990. On sensitivity estimation for nonlinear mathematical models. *Matematicheskoe*  
1264 *Modelirovanie* 2, 112–118.
- 1265 Sokol, S., 2011. *Wnt Signaling in Embryonic Development*. volume 17. Elsevier.
- 1266 Strahl, B., Allis, C., 2000. The language of covalent histone modifications. *Nature* 403, 41–45.
- 1267 Sun, J.Z., Wang, G.I., Goyal, V.K., Varshney, L.R., 2012. A framework for bayesian optimality of  
1268 psychophysical laws. *Journal of Mathematical Psychology* 56, 495–501.
- 1269 Suzuki, H., Watkins, D., Jair, K., Schuebel, K., Markowitz, S., Chen, W., Pretlow, T., Yang,  
1270 B., Akiyama, Y., Van Engeland, M., et al., 2004. Epigenetic inactivation of sfrp genes allows  
1271 constitutive wnt signaling in colorectal cancer. *Nature genetics* 36, 417–422.
- 1272 Taniguchi, H., Yamamoto, H., Hirata, T., Miyamoto, N., Oki, M., Noshio, K., Adachi, Y., Endo,  
1273 T., Imai, K., Shinomura, Y., 2005. Frequent epigenetic inactivation of wnt inhibitory factor-1 in  
1274 human gastrointestinal cancers. *Oncogene* 24, 7946–7952.
- 1275 Thorstensen, L., Lind, G.E., Løvig, T., Diep, C.B., Meling, G.I., Rognum, T.O., Lothe, R.A., 2005.  
1276 Genetic and epigenetic changes of components affecting the wnt pathway in colorectal carcinomas  
1277 stratified by microsatellite instability. *Neoplasia* 7, 99–108.
- 1278 Veeck, J., Dahl, E., 2012. Targeting the wnt pathway in cancer: the emerging role of dickkopf-3.  
1279 *Biochimica et Biophysica Acta (BBA)-Reviews on Cancer* , 18–28.
- 1280 Voronkov, A., Krauss, S., 2012. Wnt/beta-catenin signaling and small molecule inhibitors. *Current*  
1281 *pharmaceutical design* 19, 634.
- 1282 Waterman, M., 2004. Lymphoid enhancer factor/t cell factor expression in colorectal cancer. *Cancer*  
1283 *and Metastasis Reviews* 23, 41–52.
- 1284 Weber, E.H., 1834. *De pulsu resorptione, auditu et tactu. Annotationes anatomicae et physiologicae.*
- 1285 Yochum, G., 2011. Multiple wnt/ $\beta$ -catenin responsive enhancers align with the myc promoter  
1286 through long-range chromatin loops. *PloS one* 6, e18966.
- 1287 Yu, J., Virshup, D.M., 2014. Updating the wnt pathways. *Bioscience reports* 34, 593–607.
- 1288 Yuan, G., Wang, C., Ma, C., Chen, N., Tian, Q., Zhang, T., Fu, W., 2012. Oncogenic function of  
1289 dact1 in colon cancer through the regulation of  $\beta$ -catenin. *PloS one* 7, e34004.
- 1290 Zhong, Z., Ethen, N.J., Williams, B.O., 2014. Wnt signaling in bone development and homeostasis.  
1291 *Wiley Interdisciplinary Reviews: Developmental Biology* 3, 489–500.
- 1292 Zitt, M., Untergasser, G., Amberger, A., Moser, P., Stadlmann, S., Zitt, M., Müller, H., Mühlmann,  
1293 G., Perathoner, A., Margreiter, R., et al., 2008. Dickkopf-3 as a new potential marker for  
1294 neoangiogenesis in colorectal cancer: expression in cancer tissue and adjacent non-cancerous  
1295 tissue. *Disease Markers* 24, 101–109.
